# Supplementary material for: Use of a patient-centred educational exchange (PCEE) to improve patient’s self-management of medicines after a stroke: a randomised controlled trial study protocol
Source: PubMed Central journal article supplement — BMJ Open. 2018 Aug 30;8(8):e022225. doi: 10.1136/bmjopen-2018-022225 (PMC6119418; doi:10.1136/bmjopen-2018-022225), 2018-08-30
Supplement: bmjopen-2018-022225.draft_revisions.pdf [file bmjopen-2018-022225.draft_revisions.pdf]

# BMJ Open

BMJ Open is committed to open peer review. As part of this commitment we make the peer review history of every article we publish publicly available.

When an article is published we post the peer reviewers' comments and the authors' responses online. We also post the versions of the paper that were used during peer review. These are the versions that the peer review comments apply to.

The versions of the paper that follow are the versions that were submitted during the peer review process. They are not the versions of record or the final published versions. They should not be cited or distributed as the published version of this manuscript.

BMJ Open is an open access journal and the full, final, typeset and author-corrected version of record of the manuscript is available on our site with no access controls, subscription charges or pay-per-view fees (<http://bmjopen.bmj.com>).

If you have any questions on BMJ Open's open peer review process please email [info.bmjopen@bmj.com](mailto:info.bmjopen@bmj.com)

# BMJ Open

**The use of a patient centred educational exchange (PCEE) to improve patient's self-management of medicines after a stroke; a randomised controlled trial study protocol.**

|                               |                                                                                                                                                                                                                                                                                                                                                                                                                                                                                   |
|-------------------------------|-----------------------------------------------------------------------------------------------------------------------------------------------------------------------------------------------------------------------------------------------------------------------------------------------------------------------------------------------------------------------------------------------------------------------------------------------------------------------------------|
| Journal:                      | <i>BMJ Open</i>                                                                                                                                                                                                                                                                                                                                                                                                                                                                   |
| Manuscript ID                 | bmjopen-2018-022225                                                                                                                                                                                                                                                                                                                                                                                                                                                               |
| Article Type:                 | Protocol                                                                                                                                                                                                                                                                                                                                                                                                                                                                          |
| Date Submitted by the Author: | 25-Apr-2018                                                                                                                                                                                                                                                                                                                                                                                                                                                                       |
| Complete List of Authors:     | Coombes, Judith; University of Queensland, School Of Pharmacy; Princess Alexandra Hospital, Pharmacy<br>Rowett, Debra; University of South Australia School of Pharmacy and Medical Sciences, School of Pharmacy and Medical Sciences; Flinders Medical Centre, DATIS<br>Whitty, Jennifer; University of East Anglia Norwich Medical School, School of Pharmacy; University of Queensland, School of Pharmacy<br>Cottrell, Neil; The University of Queensland, School of Pharmacy |
| Keywords:                     | Adherence, Stroke < NEUROLOGY, secondary prevention, medication, academic detailing, STROKE MEDICINE                                                                                                                                                                                                                                                                                                                                                                              |
|                               |                                                                                                                                                                                                                                                                                                                                                                                                                                                                                   |

SCHOLARONE™  
Manuscripts

1  
2  
3  
4  
5 Protocol Paper V1-0  
6  
7  
8  
9

10 Title

11  
12  
13 The use of a patient centred educational exchange (PCEE) to improve patient's self-  
14 management of medicines after a stroke; a randomised controlled trial study protocol.  
15

16  
17 Lay title: A conversation with patients about medications after a stroke  
18

19 ACTRN12615000888561  
20

21 Protocol Authors:  
22

23  
24 Judith Coombes,  
25 School of Pharmacy, University of Queensland,  
26 20 Cornwall St, Woolloongabba Queensland 4102, Australia  
27 Princess Alexandra Hospital  
28 Ipswich Rd, Woolloongabba Queensland 4102, Australia  
29 ORCID 0000-0003-4871-7783  
30  
31

32 Debra Rowett  
33 School of Pharmacy and Medical Sciences, University of South Australia  
34 Playford Building, North Terrace, Adelaide SA 5000  
35 DATIS, Southern Adelaide Local Health Network  
36 Flinders Medical Centre, Flinders Drive, South Australia 5042, Australia  
37 ORCID 0000-0002-8977-0401  
38  
39

40 Jennifer A Whitty  
41 Norwich Medical School, University of East Anglia,  
42 Norwich NR4 7TJ, United Kingdom  
43 School of Pharmacy, University of Queensland,  
44 20 Cornwall St, Woolloongabba Queensland 4102, Australia  
45 ORCID 0000-0002-5886-1933  
46  
47

48 W Neil Cottrell  
49 School of Pharmacy, University of Queensland,  
50 20 Cornwall St, Woolloongabba Queensland 4102, Australia  
51 ORCID 0000-0002-0149-444X  
52  
53

54 Corresponding Author:

55 Judith Coombes

56 Email [Judith@pharmacy.uq.edu.au](mailto:Judith@pharmacy.uq.edu.au)  
57

58  
59 1 26183606\_File000018\_684379226.docx

60 For peer review only - <http://bmjopen.bmj.com/site/about/guidelines.xhtml>

1  
2  
3 School of Pharmacy, University of Queensland,  
4 20 Cornwall St, Woolloongabba Queensland 4102  
5 Australia  
6

7 Phone +61 439557748  
8 Fax+61 7 31762800  
9

10  
11  
12  
13  
14  
15  
16  
17  
18  
19  
20  
21  
22  
23  
24  
25  
26  
27  
28  
29  
30  
31  
32  
33  
34  
35  
36  
37  
38  
39  
40  
41  
42  
43  
44  
45  
46  
47  
48  
49  
50  
51  
52  
53  
54  
55  
56  
57  
58  
59  
60

For peer review only

## Abstract

### Introduction:

National and international guidelines make recommendations for secondary prevention of stroke including the use of medications. A strategy which engages patients in a conversation to personalise evidence based educational material (patient centred educational exchange (PCEE)) may empower patients to better manage their medications.

### Methods and analysis:

This protocol outlines a non-blinded randomised controlled trial (RCT). Consenting patients admitted with a diagnosis of stroke or transient ischemic attack (TIA) will be randomized 1:1 to receive either a patient centred educational exchange (PCEE) comprised of two sessions, one at the bedside before discharge and one by telephone at least ten days after discharge from hospital in addition to usual care (intervention) or usual care alone (control). The primary aim of this study is to determine whether a PCEE improves adherence to antithrombotic, antihypertensive and lipid lowering medications prescribed for secondary prevention of stroke over the three months after discharge, measured using prescription refill data. Secondary aims include: investigation of the impact of the PCEE on adherence over 12 months using prescription refill data, self-reported medication taking behaviour, self-reported clinical outcomes (blood pressure, cholesterol, adverse medication events, and readmission), quality of life, the cost utility of the intervention and changes in beliefs towards medicines and illness.

### Ethics and Dissemination:

Communication of the trial results will provide evidence to aid clinicians in conversations with patients about medication taking behaviour related to stroke prevention. The targeted audiences will be health practitioners and consumers interested in medication taking behaviour in chronic diseases and in particular those interested in secondary prevention of stroke.

The Australian New Zealand Clinical Trials Registry number is ACTRN12615000888561. The trial has ethics approval from Metro South Human Research Ethics Committee

1  
2  
3 (HREC/15/QPAH/531) and The University of Queensland Institutional Human Research  
4 Ethics (2015001612).  
5  
6  
7

## 8 **Strengths and Limitations** 9

- 10  
11  
12 • The design of a randomised controlled trial imparts rigor to provide evidence of the  
13 impact of a behavioural intervention  
14
- 15  
16 • The use of questionnaires, validated as research tools, to elicit patient perceptions,  
17 engage the patient in a conversation provides a structure for the healthcare worker.  
18
- 19  
20 • The strength of the intervention is that it is underpinned by a combination of  
21 theories of behaviour change.  
22
- 23  
24 • This study links the use of both prescription refill data as an objective adherence  
25 measurement and patient self-reported adherence.  
26
- 27  
28 • As is common with many behavioural intervention studies, this study is not blinded  
29 once the participant has been allocated to either the intervention or control group,  
30 which may introduce bias to the study.  
31  
32  
33  
34  
35  
36  
37  
38  
39  
40  
41  
42  
43  
44  
45  
46  
47  
48  
49  
50  
51  
52  
53  
54  
55  
56  
57  
58  
59  
60

## Introduction

Stroke is one of the leading causes of death worldwide<sup>1,2</sup>. About a third of those who suffer from a stroke die within 28 days and a further third are left permanently disabled placing a burden on themselves, their family and the community<sup>3,4</sup>. After an initial stroke the cumulative incidence of a subsequent stroke is about 30%, with the highest occurrence in the first 12 months (12%).<sup>5-7</sup> In an individual experiencing a transient ischaemic attack (TIA) or a minor stroke (<3 on the National Institutes of Health Stroke Scale<sup>8</sup>) the 30 day incidence of stroke is 11-15%.<sup>9</sup> After either a stroke or TIA, International<sup>10-12</sup> and Australian guidelines<sup>13</sup> recommend secondary prevention strategies. Recommendations include the use of antithrombotic therapy, medications for blood pressure lowering and cholesterol lowering medications. The high rate of recurrence in the first weeks and months of a minor stroke or TIA emphasises the importance of early initiation and subsequent persistence to secondary prevention medicines to reduce the risk of subsequent stroke.<sup>9</sup> Stroke survivors may not benefit due to poor adherence to the medications<sup>14-16</sup> or the benefit may be offset by the occurrence of adverse drug events (ADEs).<sup>17</sup>

Medication focused educational interventions to improve secondary prevention of stroke have shown impact on patients' knowledge but other outcome measures have had varied results.<sup>18-20</sup> Debate centres on whether a change in knowledge will result in a change of medicine taking behaviour or whether alternative approaches such as addressing necessities and concerns about medication,<sup>21</sup> agreeing goals, or providing key messages about medication taking will be more effective in changing behaviour. Previously validated questionnaires have been used to identify patients' perceptions of their illness,<sup>22</sup> beliefs about medications<sup>23</sup> and medication taking behaviour<sup>24</sup> and have been used to provide a structure to encourage patient input into a personalised intervention<sup>25</sup>. Another approach to empower patients in medication related self-management has incorporated "academic detailing"<sup>26,27</sup> also described as "educational visiting".<sup>28,29</sup> This method uses a social marketing framework, which is underpinned by social cognitive theory,<sup>30</sup> transtheoretical model of change,<sup>31</sup> and diffusion of innovations theory<sup>32</sup>. This approach encourages information exchange while delivering key messages in order to influence behaviour.

1  
2  
3 Combining these two strategies, identifying patients perceptions' and beliefs' then using  
4 them to personalise educational messages and to engage patients in a conversation, may  
5 empower patients to better manage their medications. This approach will be referred to as a  
6 patient centred educational exchange (PCEE). The PCEE has been tested for feasibility, and  
7 was found to be acceptable to the participants, manageable for the health care professional  
8 and the beliefs and perceptions elicited by the questionnaires were able to be used to  
9 personalise the conversation.<sup>33</sup> The impact of the PCEE on patient self-management of  
10 stroke prevention medications has yet to be determined.  
11  
12  
13  
14  
15  
16  
17  
18  
19  
20  
21  
22  
23  
24  
25  
26  
27  
28  
29  
30  
31  
32  
33  
34  
35  
36  
37  
38  
39  
40  
41  
42  
43  
44  
45  
46  
47  
48  
49  
50  
51  
52  
53  
54  
55  
56  
57  
58  
59  
60



1  
2  
3 **Aim:** The primary aim of this study is to determine whether a patient centred educational  
4 exchange (PCEE) improves adherence to antithrombotic, antihypertensive and lipid lowering  
5 medications prescribed for secondary prevention of stroke over the three months after  
6 discharge, measured using prescription refill data.  
7  
8

9  
10 Secondary aims include: investigation of the impact of the PCEE on adherence over 12  
11 months using prescription refill data, self-reported medication taking behaviour, self-  
12 reported clinical outcomes (blood pressure, cholesterol, adverse medication events, and  
13 readmission), quality of life, the cost utility of the intervention and changes in beliefs  
14 towards medicines and illness.  
15  
16

17  
18 To address these aims we will conduct a randomised controlled trial, with an intervention  
19 comprised of two PCEE sessions; one before discharge from hospital and one by telephone  
20 at least ten days after discharge.  
21  
22  
23  
24  
25

## 26 **Methods and Analysis**

27  
28 This protocol was developed in accordance with the Standard Protocol Items:  
29 recommendations for intervention trials (SPIRIT) statement (see online supplementary file 1.  
30 SPIRIT checklist).  
31  
32  
33

### 34 **Study Design and Setting**

35  
36 This study is a non-blinded randomised controlled trial (RCT). Participants will be  
37 randomized 1:1 to either the intervention group (intervention and usual care) or the control  
38 group (usual care). The setting will be the "Medical Stroke Unit" (MSU) or the Medical  
39 Admission and Planning Unit (MAPU), of an Australian tertiary referral hospital.  
40  
41  
42  
43  
44

### 45 **Study Population**

46  
47 Inclusion criteria: Participants recruited to this study must be aged 18 years or older, have  
48 been admitted to the MSU or the MAPU with a principal diagnosis of stroke or TIA, and are  
49 planned to be discharged to their home.  
50  
51  
52  
53  
54  
55  
56  
57  
58

1  
2  
3 The participant should be expected to manage their own medication after discharge home,  
4 have a documented Mental Status Questionnaire (MSQ)<sup>34</sup> score of 10/10 at the time of  
5 recruitment and be able to provide consent.  
6  
7

8  
9 Exclusion criteria: Those patients planned for discharge to a residential care facility (eg a  
10 nursing or residential care home) where a staff member is responsible for the patients'  
11 medication administration, those patients who have been planned for a rehabilitation  
12 period of greater than one month as they will be having weekly education sessions, those  
13 with an MSQ<10, unable to complete the questionnaire (even) with assistance (this may be  
14 due to language difficulties or cognitive impairment) and those who do not provide consent.  
15  
16  
17  
18

### 19 20 **Patient and Public involvement**

21  
22 A feasibility study<sup>33</sup> was conducted to inform the design of the PCEE used in this  
23 randomised controlled trial. Ten of the 18 participants completed an evaluation of the  
24 proposed intervention which resulted in changes to the graphics used, the use of mobile  
25 telephones with messaging for follow up calls and bridging sentences between  
26 questionnaires and use of the infographic? With respect to the burden of the intervention,  
27 seven of the ten indicated that the session was not too long or too short and 9/10 agreed  
28 that the materials helped them. Patients were invited to ask a questions and prompted to  
29 discuss previous experiences as part of the feasibility study, this has been included in the  
30 current protocol.  
31  
32  
33  
34  
35  
36  
37

38  
39 Patients and public were not involved in development of the research question or outcome  
40 measures, they are not involved in the recruitment or ongoing conduct of the current study.  
41  
42 Participants are given details to request results of the study.  
43  
44

### 45 **Recruitment**

46  
47 All admissions to MSU and MAPU will be screened using "bed lists" for five days of every  
48 week. Those admissions with a diagnosis of stroke or TIA will be further screened for a  
49 documented MSQ of 10/10 and plan for further rehabilitation or discharge to home. The  
50 researcher will then approach the potential participants on the ward to determine whether  
51 they are willing to participate in the study.  
52  
53  
54  
55  
56  
57  
58

1  
2  
3 **Allocation/Randomisation:** The allocation of participants to control or intervention will be  
4 concealed until the participant has been consented to reduce allocation bias. After the  
5 participant has consented to the study the research pharmacist will contact the clinical trials  
6 pharmacist, who is not involved in the study and who will identify the allocation, one to one,  
7 to either the intervention or control group. The allocation will be previously determined  
8 using a computer generated four block randomisation code using Sealed Envelope Ltd™<sup>35</sup>.  
9 The allocation will be concealed by placing the allocation in sealed opaque envelopes stored  
10 in the clinical trials office of the pharmacy department.  
11  
12

13  
14  
15  
16  
17 Once the participant is allocated the researcher will no longer be blinded to participant's  
18 allocation. The reason the researcher will no longer be blinded is that the researcher will  
19 conduct the intervention and follow-up calls.  
20  
21  
22

23 **Sample size-** The primary outcome is adherence measured by the proportion of days  
24 covered (PDC) (defined as the days of medication supplies when the medications were  
25 collected divided by the days in the time interval) over the three months after discharge,  
26 using prescription refill data for three classes of medications (antithrombotic,  
27 antihypertensive and lipid lowering medications).  
28  
29  
30  
31  
32

33 The sample size calculation used the criterion for significance (alpha) set at 0.05 and the  
34 power (beta) at 80%. It is proposed that the intervention will result in a 7% improvement in  
35 adherence compared to standard care. This difference of 7% was selected as reasonable;  
36 because an effect of this magnitude has been shown with secondary prevention  
37 medications used for cardiovascular diseases<sup>36 37</sup> and has been linked to a clinical difference  
38 <sup>38</sup>. An effect size of 0.54 (0.07/0.13) was selected using results from a study conducted with  
39 participants discharged on similar medications after a diagnosis of acute coronary  
40 syndrome<sup>37</sup>. A sample size of 55 in each arm is required for effect size of 0.54. We allowed  
41 for a slighter larger pooled standard deviation of 0.15 (effect size 0.7/.15= 0.47) requiring a  
42 sample size of n= 73. Adherence data is likely to be skewed<sup>39</sup> and so will not fulfil the  
43 requirements for a parametric test. Lehmann<sup>40</sup> suggests the addition of 15% more  
44 participants (n=84) when planning to use non-parametric tests such as the Mann Whitney.  
45 Assuming attrition rates of approximately 10% we would need to enroll at least 92  
46 participants for each group; we propose to include 100 participants in each arm. It is  
47  
48  
49  
50  
51  
52  
53  
54  
55  
56  
57  
58

1  
2  
3 predicted that approximately two participants will be recruited per week, estimating a two  
4 year recruitment period.  
5

## 6 7 **Procedure**

8  
9 Both the intervention and control group will receive usual care. In addition to usual care  
10 participants in the intervention group will receive two sessions of a “PCEE”, one before  
11 discharge and one by telephone at least ten days after discharge. These sessions will be  
12 conducted by a clinical pharmacist who attends weekly multidisciplinary MSU meetings, has  
13 a postgraduate qualification in clinical pharmacy (MSc Clin Pharm) and training in academic  
14 detailing. In this study the intervention pharmacist will also be collecting the study data.  
15  
16  
17  
18  
19

### 20 21 Usual Care

22  
23 Usual care includes admission to a stroke specific ward, multidisciplinary care by the stroke  
24 team, education using Stroke Foundation-Australia materials by the stroke nurse<sup>41</sup>, clinical  
25 pharmacy services provided by the ward pharmacist and discharge advice provided by the  
26 medical staff. Usual care provided by the ward pharmacist includes medication history  
27 taking and reconciliation, medication review during the admission, discharge reconciliation,  
28 provision of a medication list<sup>42</sup> and medication counselling at discharge.  
29  
30  
31  
32  
33

### 34 35 Control Group

36  
37 The control group will receive usual care as described above.  
38

### 39 40 Intervention - Patient centered educational exchange (PCEE)

41  
42 The intervention consists of two sessions, one which will take place at the patients’ bedside  
43 before the usual pharmacist discharge counselling and the second which will be conducted  
44 over the telephone at least ten days after discharge. These sessions are additional to, and  
45 designed to integrate with, usual care. The PCEE is structured with an introduction,  
46 conversation and conclusion.  
47  
48  
49

50  
51 The session begins with an “introduction” phase establishing credibility “*I am a pharmacist*  
52 *with an interest in patients taking medication to reduce the risk of stroke*”. Next the clinical  
53 pharmacist will give the opportunity to the patient to ask a question. “*What one thing*  
54  
55  
56  
57  
58

1  
2  
3 *would you most like to discuss about medications you have been prescribed since your*  
4 *stroke/TIA?"* There is an opportunity to answer this question before moving on.  
5

6  
7 The session will then move into the "conversation"- using previously validated  
8 questionnaires to identify patients' perceptions, beliefs and concerns about their stroke in  
9 general (using the brief-Illness Perception Questionnaire (brief-IPQ)<sup>22</sup>) and medications in  
10 particular (using the Beliefs about Medicine questionnaire specific (BMQ-specific)<sup>23</sup>). There  
11 is also an opportunity for the patient to self-report their previous medication taking  
12 behavior for the medications of interest (using the Medication Adherence Questionnaire  
13 (MAQ)<sup>24</sup>). The identified barriers and enablers will be used to personalise the conversation.  
14 A double sided single page document will be personalised and given to the participant (the  
15 detailing tool). The detailing tool contains an infographic to help illustrate the discussion  
16 about the stroke prevention medications the patient has been prescribed on one side, and  
17 four a-priori key messages on the other side (see online supplementary file 2. infographic  
18 example).  
19

20  
21 The four key messages are: "**Know** about your medications prescribed to reduce risk of  
22 stroke", "**Organise** ongoing supply of your medications", "Continue to **take** these  
23 medications as agreed with your doctors" and "**Report** any new symptoms or concerns to  
24 your doctor".  
25

26  
27 In the final phase, "conclusion", items identified to be discussed when the clinical  
28 pharmacist telephones the patient will be listed.  
29

30  
31 To provide an opportunity for "follow-up" and reinforcement of key messages, the  
32 intervention is designed to include two sessions. The clinical pharmacist arranges to  
33 telephone the participant at least ten days after discharge to ask them the same questions  
34 and to talk about their medications.  
35

36  
37 It is hypothesised that patients in the intervention group will be influenced to organise  
38 ongoing supply of their medications and take their medications as prescribed. In addition, it  
39 is hoped that if they identify that they are experiencing unwanted effects from a  
40 medication(s) they will not keep taking medication(s) long term rather discuss their  
41 concerns with their doctor.  
42  
43  
44  
45  
46  
47

## Outcomes

The primary outcome is adherence measured by the proportion of days covered (PDC) over the three months after discharge, using prescription refill data (obtained from the pharmaceutical benefits scheme (PBS)) for the combination of up to three classes of medications (antithrombotic, antihypertensive and lipid lowering medications) prescribed.

Secondary outcomes include:

- Adherence measured by the proportion of days covered (PDC) over the twelve months after discharge, using prescription refill data for up to three classes of medications (antithrombotic, antihypertensive and lipid lowering medications).
- Self-reported medication adherence (measured using the Medication Adherence Questionnaire (MAQ)), organising of ongoing medication supply, and medication taking behaviour and communication to prescriber in response to perceived medication related adverse events.
- Self-reported changes between baseline and 3 and 12 months in perception to their illness (stroke) using Brief-IPQ and changes between baseline and 3 and 12 months in beliefs about medications for stroke prevention using BMQ-specific.
- Clinical outcomes:
  - medication related adverse events (identified by self-report or hospital readmission),
  - self-report of blood pressure (BP) results,
  - self-report of Cholesterol level,
  - re-admission to hospital with stroke and/or myocardial infarction (MI) (identified by self-report or hospital records).
- Changes from baseline to 3 and 12 months in self-reported quality of life using EQ-5D-5L.<sup>43 44</sup>
- Cost utility analysis using a ratio of incremental cost (cost of the PCEE intervention compared to usual care) to incremental benefit (change in quality-adjusted life years).<sup>45</sup>

The complex relationship between the intervention described here and the measures of the impact we expect to make has been described by authors of previous studies<sup>46 47</sup>. Table 1

has been adapted from Shay and colleagues to categorise the study outcome measures by outcome type and who measures it.

Table 1. The proposed measures categorised by outcome type and who measures it.

|                       | Behavioural outcomes                                      | Affective-cognitive outcomes. (This includes knowledge, understanding, satisfaction)                     | Health outcomes                        | Economic outcomes                      |
|-----------------------|-----------------------------------------------------------|----------------------------------------------------------------------------------------------------------|----------------------------------------|----------------------------------------|
| Patient self-reported | Self report of adherence using MAQ                        | Participant ability to identify each medication of interest along, reason for use when answering the MAQ | Blood Pressure, Cholesterol levels     |                                        |
|                       | Self-report of organising medication supply               | Participant knowing their : blood pressure, cholesterol level                                            | Blood Pressure,Cholesterol levels      |                                        |
|                       | Self report of action if they experienced an ADE          | Participant beliefs and perceptions using the BMQ-specific and brief-IPQ                                 | Self reported quality of life EQ-5D-5L | Self reported quality of life EQ-5D-5L |
|                       |                                                           |                                                                                                          | Self reported ADE                      |                                        |
| Observer collected    | Visit to doctor – Medicare data                           |                                                                                                          | Readmission/admission for ADE          | Readmission/admission for ADE (S)      |
|                       | Prescription refills- Pharmaceutical benefits scheme data |                                                                                                          | Events-Stroke, MI                      | Events-Stroke, MI                      |
|                       |                                                           |                                                                                                          |                                        | Time to conduct intervention           |

Brief-IPQ= brief-Illness Perception Questionnaire<sup>22</sup>, BMQ specific= Beliefs about Medicine questionnaire specific<sup>23</sup>, MAQ= Medication Adherence Questionnaire<sup>24</sup>) EQ-5D-5L= Quality of Life Measure<sup>43</sup> MI= Myocardial Infarction, ADE=Adverse Drug Event

### Behavioural measures

Behavioural measures look at things the participant has done. In this study visiting the doctor and having their medication dispensed is observer collected<sup>48 49</sup>. Pharmaceutical claims data can provide an objective, non-invasive measure of adherence and has been used in many drug trials and in a number of studies similar to this one. A range of methods for use of claims data to measure medication possession ratios and proportion of days covered have been described to assess an individuals' medication adherence<sup>39 48-51</sup>.

The Proportion of Days Covered is defined as the days of medication supplies when the medications were collected divided by the days in the time interval. This can be averaged over the total (for example a 90 day interval), or to be more reflective of medication exposure, a shorter interval (for example in Australia most medications for chronic diseases are supplied at approximately one month intervals) can be measured and added together.

1  
2  
3 The proportion of days covered calculated using multiple short intervals<sup>50 51</sup> can more  
4 accurately account for gaps in supply or extra medication supplies. The example shown in  
5 Figure 1 adapted from Bijlsma<sup>50</sup> and Bryson<sup>51</sup> shows how the adherence over three lots of  
6 30 day intervals can be calculated using the gaps in supply for three patients obtaining 30  
7 day supplies. The calculation used is; Proportion of 90 days covered= (90 –total of days not  
8 covered in each 30 day interval)/90x100.  
9  
10  
11  
12

13  
14 Figure 1. Examples of Proportion of days covered calculated using multiple 30 day intervals.  
15

16 Patient 1 obtained medications on the day of discharge, 30 days later and then had a gap of  
17 five days before the third supply. Patient 1 PDC= [(30 +0) + (30 +0) + (30-5)]/90x100=94%  
18  
19

20 Patient 2 obtained the first supply five days before discharge these were not used until the  
21 day of discharge so although the second supply was obtained 10 days after the first supply  
22 there was only a 5 day gap in supply for the patient. Five days of tablets remaining from the  
23 second supply were used in the third interval. The third supply was obtained after a 10 day  
24 gap. Patient 2 PDC= [(30 +5-5) + (30 -5) + (30+5-10)]/90x100=89%  
25  
26  
27  
28

29 Patient 3 obtained medications on the day of discharge, 20 days later and then had a gap of  
30 40 days before the third supply. Patient 3 PDC= [(30 +0) + (30 +10-10) + (30-  
31 30)]/90x100=67%  
32  
33  
34  
35

36  
37  
38 In this study the days covered in each dispensing interval will be calculated for up to three  
39 different medications (antithrombotic, antihypertensive, lipid lowering medication)  
40 dependant on the medication plan at discharge. These will then be expressed as a mean  
41 (across the up to three medications) percentage and analysed as a continuous variable.  
42  
43  
44

45 Self-reported behavioural measures in this study include self-report of medication  
46 adherence using the MAQ<sup>24</sup>, organising an ongoing medication supply and action taken if  
47 they experience adverse effects from their medication. The MAQ is a well validated scale,  
48 previously used in many clinical conditions.<sup>52</sup>  
49  
50  
51  
52

### 53 Affective cognitive outcomes

54  
55  
56  
57  
58



1  
2  
3 Affective cognitive outcomes include measures of what the participant knows and how they  
4 feel, these are usually self-reported.  
5

6  
7 In this study the affective cognitive group includes metrics such as knowledge and  
8 understanding regarding name, type and dose of medications, participants knowing their BP  
9 reading or cholesterol level, participants' perceptions of their illness and beliefs about their  
10 medications. Participant perceptions of their stroke will be evaluated using the adapted-  
11 Brief IPQ at baseline, 3 and 12 months. Beliefs about antithrombotic, antihypertensive and  
12 lipid lowering medications will be evaluated using the BMQ-specific at baseline, 3 months  
13 and 12 months. Changes in these may be able to be used to explain changes in other  
14 measures for example adherence.<sup>47</sup>  
15  
16  
17  
18  
19  
20

### 21 Health Outcomes

22  
23  
24 In this study we will evaluate patient self-reported clinical (Blood Pressure (BP) and  
25 Cholesterol) measures and readmissions, subsequent stroke or myocardial infarction,  
26 adverse drug reactions and the quality of life measure.  
27  
28  
29

30 Medication related adverse events will be identified by patient self-report using probe  
31 questions adapted from a previously validated trigger tool<sup>53</sup> at 3 months and 12 months for  
32 each medication class of interest. Medication related adverse events will also be collected  
33 from any readmission notes at 3 months and 12 months post discharge.  
34  
35  
36

37 Quality of life will be measured using EQ-5D-5L<sup>43</sup> before discharge (baseline), 3 months and  
38 12 months. This tool (EQ-5D-5L) has previously been used in stroke research.<sup>54</sup>  
39  
40  
41  
42  
43

### 44 Economic Outcomes

45  
46  
47 Economic outcomes will be determined from the health service perspective using an  
48 incremental cost effectiveness ratio (ICER). The ICER indicates the difference between the  
49 intervention and control cost (time and resources costed) per the difference in quality-  
50 adjusted life years (QALYs) determined using the quality of life measure EQ-5D-5L. Time  
51 taken to deliver the PCEE sessions (intervention group only) will be recorded on the  
52 interview schedule at both the bedside (before discharge) and telephone follow-up (7-10  
53  
54  
55  
56  
57  
58

1  
2  
3 days post discharge) sessions and costed using standard pharmacist salary rates. Any impact  
4 of the intervention on health-resource use (e.g. medication use, hospital readmissions) will  
5 be considered when estimating costs. Patient interview using EQ-5D-5L will be conducted  
6 before discharge (baseline), at 3 months and 12 months. Uncertainty in the estimated ICER  
7 will be evaluated using non-parametric bootstrapping techniques.  
8  
9  
10

### 11 **Data Collection**

12  
13  
14 A schedule of assessments including the timing for data collection is shown in Table 2. Data  
15 will be collected by the investigator prior to the patient's discharge, at least 10 days after  
16 discharge (intervention group only), at 3 months and at 12 months.  
17  
18  
19

20 Demographic data collected prior to the patients discharge includes patient age, sex, stroke  
21 type, whether they have had a previous stroke, whether they live alone, cholesterol levels  
22 and BP on discharge. The demographic data is required to describe the population in the  
23 study and to ensure the intervention and usual care groups are comparable.  
24  
25  
26

27  
28 Participant self-reported data will be obtained by the researcher conducting telephone  
29 follow-up using the phone numbers they provide during consent. If the participant does not  
30 answer the first call and has provided a mobile telephone number, the researcher will send  
31 a text message using the study mobile phone asking for a "good time to talk." The protocol  
32 allows for a total of three attempts to contact the participant for follow-up calls.  
33  
34  
35  
36  
37  
38  
39  
40  
41  
42  
43  
44  
45  
46  
47  
48  
49  
50  
51  
52  
53  
54  
55  
56  
57  
58  
59  
60

Table 2. Schedule of enrolment, interventions, and assessments for Patient Centered Educational exchange (PCEE) to improve patients' self-management of medications after a stroke.

| <b>TIMEPOINT</b>                                                                                                                                                                                                                                                                                                                                                                                                                                                                                                                                                                                  |                                                                                           | <i>-t1</i>                       | <i>-t2</i><br>Before<br>discharge | <i>t0</i><br>Date of<br>discharge | <i>t1</i><br>approximately<br>10 days post<br>discharge | <i>t2</i><br>approximately<br>3 months post<br>discharge | <i>t3</i><br>approximately<br>12 months post<br>discharge |
|---------------------------------------------------------------------------------------------------------------------------------------------------------------------------------------------------------------------------------------------------------------------------------------------------------------------------------------------------------------------------------------------------------------------------------------------------------------------------------------------------------------------------------------------------------------------------------------------------|-------------------------------------------------------------------------------------------|----------------------------------|-----------------------------------|-----------------------------------|---------------------------------------------------------|----------------------------------------------------------|-----------------------------------------------------------|
|                                                                                                                                                                                                                                                                                                                                                                                                                                                                                                                                                                                                   |                                                                                           |                                  | Post-allocation                   |                                   |                                                         |                                                          |                                                           |
| <i>Procedure</i>                                                                                                                                                                                                                                                                                                                                                                                                                                                                                                                                                                                  | <i>Detail</i>                                                                             | <i>Baseline</i>                  | <i>Intervention</i>               |                                   | <i>Intervention</i>                                     | <i>Evaluation</i>                                        | <i>Evaluation</i>                                         |
| <b>ENROLMENT:</b>                                                                                                                                                                                                                                                                                                                                                                                                                                                                                                                                                                                 |                                                                                           |                                  |                                   |                                   |                                                         |                                                          |                                                           |
| <i>Eligibility screen</i>                                                                                                                                                                                                                                                                                                                                                                                                                                                                                                                                                                         | <i>MSQ<sup>1,2</sup>=10</i><br><i>Not for</i><br><i>extended</i><br><i>rehabilitation</i> | <i>X</i>                         |                                   |                                   |                                                         |                                                          |                                                           |
| <i>Informed consent</i>                                                                                                                                                                                                                                                                                                                                                                                                                                                                                                                                                                           |                                                                                           | <i>X</i>                         |                                   |                                   |                                                         |                                                          |                                                           |
| <i>Randomisation</i>                                                                                                                                                                                                                                                                                                                                                                                                                                                                                                                                                                              |                                                                                           | <i>X</i>                         |                                   |                                   |                                                         |                                                          |                                                           |
| <b>INTERVENTION:</b>                                                                                                                                                                                                                                                                                                                                                                                                                                                                                                                                                                              |                                                                                           |                                  |                                   |                                   |                                                         |                                                          |                                                           |
| <i>First Session</i><br><i>(PCEE)</i>                                                                                                                                                                                                                                                                                                                                                                                                                                                                                                                                                             | <i>Bedside</i><br><i>Interview</i><br><i>Time taken<sup>3</sup></i>                       |                                  | <i>X</i><br><i>X</i>              |                                   |                                                         |                                                          |                                                           |
| <i>Second Session</i><br><i>(PCEE)</i>                                                                                                                                                                                                                                                                                                                                                                                                                                                                                                                                                            | <i>10 day follow-</i><br><i>up interview</i><br><i>Time taken<sup>3</sup></i>             |                                  |                                   |                                   | <i>X</i><br><i>X</i>                                    |                                                          |                                                           |
| <b>ASSESSMENTS:</b>                                                                                                                                                                                                                                                                                                                                                                                                                                                                                                                                                                               |                                                                                           |                                  |                                   |                                   |                                                         |                                                          |                                                           |
| <i>Brief-IPQ,</i><br><i>BMQ-specific,</i><br><i>MAQ</i>                                                                                                                                                                                                                                                                                                                                                                                                                                                                                                                                           |                                                                                           | <i>X</i><br><i>X</i><br><i>X</i> |                                   |                                   | <i>X</i><br><i>X</i><br><i>X</i>                        | <i>X</i><br><i>X</i><br><i>X</i>                         | <i>X</i><br><i>X</i><br><i>X</i>                          |
| <i>EQ-5D-5L</i><br><i>BP, Cholesterol</i>                                                                                                                                                                                                                                                                                                                                                                                                                                                                                                                                                         |                                                                                           | <i>X</i><br><i>X<sup>2</sup></i> |                                   |                                   |                                                         | <i>X</i><br><i>X<sup>4</sup></i>                         | <i>X</i><br><i>X<sup>4</sup></i>                          |
| <i>PBS/MBS data</i><br><i>Admissions,</i><br><i>Stroke, MI</i><br><i>Self-report of ADRs and</i><br><i>Action if ADRs</i>                                                                                                                                                                                                                                                                                                                                                                                                                                                                         |                                                                                           |                                  |                                   |                                   |                                                         | <i>X</i><br><i>X</i><br><i>X</i><br><i>X</i>             | <i>X</i><br><i>X</i><br><i>X</i><br><i>X</i>              |
| <p><i>1.-Mental State Quotient<sup>34</sup>, 2-these are standard care clinical tests performed as part of routine patient care 3-time taken for PCEE, 4</i><br/> <i>-self reported by participants. Brief IPQ=Brief Illness Perception Questionnaire<sup>22</sup>, BMQ specific=Beliefs about medicines</i><br/> <i>Questionnaire<sup>23</sup>, MAQ=Medication Adherence Questionnaire<sup>24</sup>, EQ-5D-5L<sup>43</sup>, PBS/MBS data=Dispensing data obtained from the</i><br/> <i>Australians Pharmaceutical Benefits Scheme, MI= Myocardial Infarction, ADR=Adverse Drug Reactions</i></p> |                                                                                           |                                  |                                   |                                   |                                                         |                                                          |                                                           |

## Data Management

Data will be entered electronically from the case record forms using a study number with no identifying information into Microsoft Excel® and SPSS Statistics 25® both stored on a password protected computer. In all reports from this research, information will be provided in such a way that the participant cannot be identified. Data entry and analyses will be performed using Microsoft Excel® and SPSS Statistics 25®.

## Data Analysis

An intention to treat analysis will be conducted. Results will be reported as numbers and percentages for categorical variables and means (SD) or medians (IQR) for continuous variables. Demographic data and baseline characteristics in the intervention and control groups will be compared using descriptive statistics. Outcomes and changes in outcomes (from baseline) will be compared at 3 months and 12 months.

Adherence measured using the PDC from the prescription refill data will be compared using the Mann-Whitney two-sided test. Changes from baseline in quality of life, perceptions of illness and beliefs about medicines will be analysed using the Mann Whitney test. Adherence by self-report, medication related adverse events and re-admissions will be analysed using Chi Squared.

**Adverse Event Reporting and Quality Assurance:** This study involves completing a questionnaire and discussing stroke medications through one face to face interview and three follow up telephone calls for the intervention group. The control group will complete one face to face interview and two follow-up telephone calls. It is possible that during either the face to face interview or one of the telephone interviews, the participant identifies a medication related issue. Although this is unlikely to be as a result of the study the researcher may still have concerns over the patients' safety. If the researcher has concerns requiring immediate

1  
2  
3 intervention the patients' doctor will be contacted. In the case of the face to face interview in  
4 the hospital that will be a medical member of the treating team. In the case of the telephone  
5 interview that will be the patients' General Practitioner.  
6  
7  
8

9 This is a randomised controlled trial where data on adverse drug reactions and events including  
10 stroke and readmission will be collected. It is possible that differences can be determined  
11 between the two groups before the recruitment period is complete. A data safety monitoring  
12 committee (consisting of an independent medical doctor- clinical pharmacologist and  
13 pharmacist- Drug Use Evaluation Pharmacist) has been established to analyse the adverse  
14 events every 6 months with responsibility to terminate recruitment into the study early if  
15 necessary.  
16  
17  
18  
19  
20  
21  
22

23 This randomised controlled trial will provide evidence about the effect of a patient centred  
24 educational exchange on patient adherence, self-reported medication taking behaviour, clinical  
25 outcomes, quality of life, changes in knowledge, and beliefs towards medicines and illness. It is  
26 expected that communication of results will inform an evidence based approach to  
27 communication with patients about medication taking behaviour related to stroke prevention.  
28 Communication of results of this study will seek to impact on the practice of health  
29 practitioners and consumers interested in patient medicine taking behaviour and those  
30 interested in secondary prevention of stroke.  
31  
32  
33  
34  
35  
36  
37  
38  
39  
40  
41  
42

### 43 **Ethics and Dissemination**

44 This trial has been registered on the Australian New Zealand Clinical Trials Registry, the number  
45 is ACTRN12615000888561. The trial has ethics approval from Metro South Human Research  
46 Ethics Committee (HREC/15/QPAH/531) and The University of Queensland Institutional Human  
47 Research Ethics Approval Number 2015001612.  
48  
49  
50  
51

52 Participants will be provided with information about the study and asked if they consent to the  
53 study; "Participant information and consent form" (see online supplementary file 3. Patient  
54  
55  
56  
57

1  
2  
3 Information and Consent Form). To obtain consent for medication refill data from the  
4 Pharmaceutical Benefits Scheme and occasions of service by visits to Doctor data from  
5 Medicare, the patients will be given an extra consent form as required by the Department of  
6 Human Services. This is also contained in the "Participant information and consent form". The  
7 patient can choose not to supply the extra consent for access to Pharmaceutical Benefits  
8 Scheme/Medicare data. The participant is free to withdraw from the study at any time.  
9  
10  
11  
12  
13  
14

15 **Acknowledgements:** The authors would like to acknowledge the feedback and advice provided  
16 by participants of the feasibility study conducted to inform this protocol. The authors would like  
17 to acknowledge the encouragement and feedback from the Medical and Nursing Staff of the  
18 Stroke Unit at Princess Alexandra Hospital during the development of this protocol.  
19  
20

21 **Contributors:** JC, NC, DR and JW were all equally involved in the development of this protocol.  
22 DR provided advice on academic detailing. JW provided advice on Quality of Life measurement  
23 and economic analysis. JC and NC wrote the initial drafts of this paper. All authors have been  
24 involved in the reviewing and editing and approval of the final protocol manuscript.  
25  
26  
27

28 **Competing interests:** None declared  
29  
30

31 **Funding:** The Research Strategies Funding, School of Pharmacy, University of Queensland has  
32 provided funding for the first 3 month Pharmaceutical Benefits Scheme/Medicare claims data  
33 for the first 60 participants. Further funding is being sought to pay for the remaining claims  
34 data.  
35  
36  
37  
38

39 **Data sharing:** The data from this study is not available for data sharing.  
40  
41  
42  
43

## 44 **References:**

- 45  
46  
47  
48 1. Australian Bureau of Statistics. 4821.0.55.001 - Cardiovascular Disease in Australia: A  
49 Snapshot, 2004-05 Canberra 2006 [Available from:  
50 <http://www.abs.gov.au/ausstats/abs@.nsf/mf/4821.0.55.001/> accessed 2nd February  
51 2017.  
52  
53  
54 2. Hankey GJ. The global and regional burden of stroke. *The Lancet Global Health*  
55 2013;1(5):e239-e40. doi: 10.1016/s2214-109x(13)70095-0  
56  
57

58 20 26183606\_File000018\_684379226.docx  
59

- 1  
2  
3 3. Feigin VL, Forouzanfar MH, Krishnamurthi R, et al. Global and regional burden of stroke  
4 during 1990–2010: findings from the Global Burden of Disease Study 2010. *The Lancet*  
5 2014;383(9913):245-55. doi: 10.1016/s0140-6736(13)61953-4  
6  
7
- 8 4. Australian Institute of Health and Welfare. Australia's Health 2016. Australia's health series.  
9 Canberra: AIHW, 2016.  
10  
11
- 12 5. Hardie K, Hankey GJ, Jamrozik K, et al. Ten-year risk of first recurrent stroke and disability  
13 after first-ever stroke in the Perth Community Stroke Study. *Stroke* 2004;35(3):731-35.  
14 doi: Doi 10.1161/01.Str.0000116183.50167.D9  
15  
16
- 17 6. Burn J, Dennis M, Bamford J, et al. Long-term risk of recurrent stroke after a first-ever stroke.  
18 The Oxfordshire Community Stroke Project. *Stroke* 1994;25(2):333-7. [published Online  
19 First: 1994/02/01]  
20  
21
- 22 7. Hankey GJ. Long-Term Outcome after Ischaemic Stroke/Transient Ischaemic Attack.  
23 *Cerebrovascular Diseases* 2003;16(Suppl. 1):14-19.  
24  
25
- 26 8. Goldstein LB, Bertels C, Davis JN. Interrater reliability of the NIH stroke scale. *Arch Neurol*  
27 1989;46(6):660-2.  
28  
29
- 30 9. Coull AJ, Lovett JK, Rothwell PM, et al. Population based study of early risk of stroke after  
31 transient ischaemic attack or minor stroke: implications for public education and  
32 organisation of services. *Brit Med J* 2004;328(7435):326-28. doi:  
33 10.1136/bmj.37991.635266.44  
34  
35
- 36 10. Furie KL, Kasner SE, Adams RJ, et al. Guidelines for the prevention of stroke in patients with  
37 stroke or transient ischemic attack: a guideline for healthcare professionals from the  
38 american heart association/american stroke association. *Stroke; a journal of cerebral*  
39 *circulation* 2011;42(1):227-76. doi: 10.1161/STR.0b013e3181f7d043 [published Online  
40 First: 2010/10/23]  
41  
42
- 43 11. Intercollegiate Stroke Working Party. National clinical guideline for stroke. 4th Edition ed.  
44 London: Royal College of Physicians 2012.  
45  
46
- 47 12. Scottish Intercollegiate Guidelines Network. Management of patients with stroke or  
48 TIA:assessment, investigation, immediate management and secondary prevention. In:  
49 Scottish Intercollegiate Guidelines Network, ed. Edinburgh: Scottish Intercollegiate  
50 Guidelines Network, Elliott House, 8 -10 Hillside Crescent, 2008.  
51  
52
- 53 13. Stroke Foundation. Clinical Guidelines for Stroke Management 2017. Melbourne Australia.:  
54 Stroke Foundation 2017.  
55  
56

- 1  
2  
3  
4  
5  
6  
7  
8  
9  
10  
11  
12  
13  
14  
15  
16  
17  
18  
19  
20  
21  
22  
23  
24  
25  
26  
27  
28  
29  
30  
31  
32  
33  
34  
35  
36  
37  
38  
39  
40  
41  
42  
43  
44  
45  
46  
47  
48  
49  
50  
51  
52  
53  
54  
55  
56  
57  
58  
59
14. Kronish IM, Diefenbach MA, Edmondson DE, et al. Key Barriers to Medication Adherence in Survivors of Strokes and Transient Ischemic Attacks. *Journal of general internal medicine* 2013 doi: 10.1007/s11606-012-2308-x [published Online First: 2013/01/05]
  15. Bushnell CD, Olson DM, Zhao X, et al. Secondary preventive medication persistence and adherence 1 year after stroke. *Neurology* 2011;77(12):1182-90. doi: 10.1212/WNL.0b013e31822f0423 [published Online First: 2011/09/09]
  16. Glader EL, Sjolander M, Eriksson M, et al. Persistent Use of Secondary Preventive Drugs Declines Rapidly During the First 2 Years After Stroke. *Stroke* 2010;41(2):397-401. doi: Doi 10.1161/Strokeaha.109.566950
  17. Runciman WB, Roughead EE, Semple SJ, et al. Adverse drug events and medication errors in Australia. *International Journal for Quality in Health Care* 2003;15(Supplement 1):i49–i59.
  18. Ellis G, Rodger J, McAlpine C, et al. The impact of stroke nurse specialist input on risk factor modification: a randomised controlled trial. *Age and Ageing* 2005;34(4):389-92. doi: DOI 10.1093/ageing/afi075
  19. McManus JA, Craig A, McAlpine C, et al. Does behaviour modification affect post-stroke risk factor control? Three-year follow-up of a randomized controlled trial. *Clinical rehabilitation* 2009;23(2):99-105. doi: 10.1177/0269215508095874 [published Online First: 2009/01/09]
  20. Adie K, James MA. Does telephone follow-up improve blood pressure after minor stroke or TIA? *Age Ageing* 2010;39(5):598-603. doi: 10.1093/ageing/afq085 [published Online First: 2010/07/30]
  21. O'Carroll RE, Chambers JA, Dennis M, et al. Improving adherence to medication in stroke survivors: a pilot randomised controlled trial. *Annals of behavioral medicine : a publication of the Society of Behavioral Medicine* 2013;46(3):358-68. doi: 10.1007/s12160-013-9515-5 [published Online First: 2013/05/15]
  22. Broadbent E, Petrie KJ, Main J, et al. The brief illness perception questionnaire. *J Psychosom Res* 2006;60(6):631-7. doi: 10.1016/j.jpsychores.2005.10.020 [published Online First: 2006/05/30]
  23. Horne R, Weinman J, Hankins M. The beliefs about medicines questionnaire: the development and evaluation of a new method for assessing the cognitive representation of medication. *Psychology and Health* 1999;14(1):1-24.



- 1  
2  
3 24. Morisky DE, Green LW, Levine DM. Concurrent and predictive validity of a self-reported  
4 measure of medication adherence. *Medical Care* 1986;24(1):67-74.  
5  
6  
7 25. Nguyen TMU, La Caze A, Cottrell N. Validated adherence scales used in a measurement-  
8 guided medication management approach to target and tailor a medication adherence  
9 intervention: a randomised controlled trial. *BMJ Open* 2016;6(11)  
10  
11  
12 26. Soumerai SB, Avorn J. Principles of educational outreach ('academic detailing') to improve  
13 clinical decision making. *JAMA* 1990;263(4):549-56. [published Online First: 1990/01/26]  
14  
15  
16 27. O'Brien Mary A, Rogers S, Jamtvedt G, et al. Educational outreach visits: effects on  
17 professional practice and health care outcomes. *Cochrane Db Syst Rev* 2007; (4).  
18 <http://onlinelibrary.wiley.com/doi/10.1002/14651858.CD000409.pub2/abstract>  
19  
20 [http://onlinelibrary.wiley.com/store/10.1002/14651858.CD000409.pub2/asset/CD000409.pdf?](http://onlinelibrary.wiley.com/store/10.1002/14651858.CD000409.pub2/asset/CD000409.pdf?v=1&t=hh9xh6bh&s=09db68c95091bda34e3b4e28ad775312ec107ff5)  
21 [v=1&t=hh9xh6bh&s=09db68c95091bda34e3b4e28ad775312ec107ff5.](http://onlinelibrary.wiley.com/store/10.1002/14651858.CD000409.pub2/asset/CD000409.pdf?v=1&t=hh9xh6bh&s=09db68c95091bda34e3b4e28ad775312ec107ff5)  
22  
23  
24 28. West CM, Dodd MJ, Paul SM, et al. The PRO-SELF(c): Pain Control Program--an effective  
25 approach for cancer pain management. *Oncology nursing forum* 2003;30(1):65-73. doi:  
26 10.1188/03.onf.65-73 [published Online First: 2003/01/08]  
27  
28  
29 29. Abernethy AP, Currow DC, Shelby-James T, et al. Delivery Strategies to Optimize Resource  
30 Utilization and Performance Status for Patients With Advanced Life-Limiting Illness:  
31 Results From the "Palliative Care Trial" [ISRCTN81117481]. *Journal of Pain and Symptom*  
32 *Management* 2012;45(3):488-505.  
33  
34  
35 30. Bandura A. Self-efficacy: Toward a unifying theory of behavioral change. *Psychological*  
36 *Review* 1977;84(2):191-215. doi: 10.1037/0033-295X.84.2.191  
37  
38  
39 31. Prochaska JO, Diclemente CC, Norcross JC. In Search of How People Change - Applications to  
40 Addictive Behaviors. *Am Psychol* 1992;47(9):1102-14. doi: Doi 10.1037/0003-  
41 066x.47.9.1102  
42  
43  
44 32. Rogers EM. Diffusion of preventive innovations. *Addict Behav* 2002;27(6):989-93. doi: Pii  
45 S0306-4603(02)00300-3  
46  
47  
48 Doi 10.1016/S0306-4603(02)00300-3  
49  
50  
51 33. Coombes J, Rowett D, Whitty J, et al. A Conversation About Stroke Medications: Using  
52 Patient Perceptions to Personalise Educational Messages. *Cerebrovasc Dis* 2016;42  
53 Suppl 1:100. doi: 10.1159/000447732  
54  
55  
56  
57  
58  
59

- 1  
2  
3 34. Pfeiffer E. A short portable mental status questionnaire for the assessment of organic brain  
4 deficit in elderly patients. *J Am Geriatr Soc* 1975;23(10):433-41. [published Online First:  
5 1975/10/01]  
6  
7  
8 35. SealedenvelopeLTD. sealed envelope London: Clerkenwell Workshops; 2015 [accessed  
9 Accessed 17 Jul 2015 2015].  
10  
11  
12 36. Nguyen VHV, Poon J, Tokuda L, et al. Pharmacist telephone interventions improve  
13 adherence to stroke preventive medications and reduce stroke risk factors: A  
14 randomized controlled trial. *Stroke* 2011;42(3):e244.  
15  
16  
17 37. Ho PM, Lambert-Kerzner A, Carey EP, et al. Multifaceted intervention to improve  
18 medication adherence and secondary prevention measures after acute coronary  
19 syndrome hospital discharge: a randomized clinical trial. *JAMA internal medicine*  
20 2014;174(2):186-93. doi: 10.1001/jamainternmed.2013.12944 [published Online First:  
21 2013/11/20]  
22  
23  
24  
25 38. Bailey JE, Wan JY, Tang J, et al. Antihypertensive medication adherence, ambulatory visits,  
26 and risk of stroke and death. *J Gen Intern Med* 2010;25(6):495-503. doi:  
27 10.1007/s11606-009-1240-1 [published Online First: 2010/02/19]  
28  
29  
30 39. Hedegaard U, Kjeldsen LJ, Pottegard A, et al. Multifaceted intervention including  
31 motivational interviewing to support medication adherence after stroke/transient  
32 ischemic attack: a randomized trial. *Cerebrovascular diseases extra* 2014;4(3):221-34.  
33 doi: 10.1159/000369380 [published Online First: 2015/01/20]  
34  
35  
36  
37 40. Lehmann EL, D'Abrera HJM. Nonparametrics : statistical methods based on ranks / E. L.  
38 Lehmann, with the special assistance of H. J. M. D'Abrera. San Fransisco1998:76-81.  
39  
40  
41 41. Stroke Foundation. My Stroke Journey Melbourne: Stroke Foundation; 2017 [cited 2018  
42 3/1/18]. Available from: [https://strokefoundation.org.au/about-stroke/help-after-  
43 stroke/stroke-resources-and-fact-sheets2018](https://strokefoundation.org.au/about-stroke/help-after-stroke/stroke-resources-and-fact-sheets2018).  
44  
45  
46 42. Lum E, Muscillo N, McLeod S, et al. Medication Reconciliation—the Queensland Health  
47 Experience. *Journal of Pharmacy Practice and Research* 2007;37(1):7-10. doi:  
48 10.1002/j.2055-2335.2007.tb00647.x  
49  
50  
51 43. Euroqol Research Foundation. EQ-5D-5L User Guide 2015 [cited 2018 27/1/18]. User Guide].  
52 Available from: [https://euroqol.org/wp-content/uploads/2016/09/EQ-5D-  
53 5L\\_UserGuide\\_2015.pdf](https://euroqol.org/wp-content/uploads/2016/09/EQ-5D-5L_UserGuide_2015.pdf) accessed 27/1/18 2018.  
54  
55  
56  
57  
58  
59  
60

- 1  
2  
3  
4 44. Herdman M, Gudex C, Lloyd A, et al. Development and preliminary testing of the new five-  
5 level version of EQ-5D (EQ-5D-5L). *Quality of Life Research* 2011;20(10):1727-36. doi:  
6 10.1007/s11136-011-9903-x  
7  
8  
9 45. Norman R, Cronin P, Viney R. A Pilot Discrete Choice Experiment to Explore Preferences for  
10 EQ-5D-5L Health States. *Applied Health Economics and Health Policy* 2013;11(3):287-98.  
11 doi: 10.1007/s40258-013-0035-z  
12  
13 46. Shay LA, Lafata JE. Where Is the Evidence? A Systematic Review of Shared Decision Making  
14 and Patient Outcomes. *Med Decis Making* 2014 doi: 10.1177/0272989X14551638  
15  
16  
17 47. O'Carroll RE, Chambers JA, Dennis M, et al. Improving medication adherence in stroke  
18 survivors: mediators and moderators of treatment effects. *Health Psychol*  
19 2014;33(10):1241-50. doi: 10.1037/hea0000082 [published Online First: 2014/07/16]  
20  
21  
22 48. Lehmann A, Aslani P, Ahmed R, et al. Assessing medication adherence: options to consider.  
23 *International journal of clinical pharmacy* 2014;36(1):55-69. doi: 10.1007/s11096-013-  
24 9865-x [published Online First: 2013/10/30]  
25  
26  
27 49. Steiner JF, Prochazka AV. The assessment of refill compliance using pharmacy records:  
28 methods, validity, and applications. *J Clin Epidemiol* 1997;50(1):105-16. [published  
29 Online First: 1997/01/01]  
30  
31  
32 50. Bijlsma MJ, Janssen F, Hak E. Estimating time-varying drug adherence using electronic  
33 records: extending the proportion of days covered (PDC) method. *Pharmacoepidem Dr S*  
34 2016;25(3):325-32. doi: 10.1002/pds.3935  
35  
36  
37 51. Bryson CL, Au DH, Young B, et al. A refill adherence algorithm for multiple short intervals to  
38 estimate refill compliance (ReComp). *Medical Care* 2007;45(6):497-504. doi: DOI  
39 10.1097/MLR.0b013e3180329368  
40  
41  
42 52. Nguyen TM, Caze AL, Cottrell N. What are validated self-report adherence scales really  
43 measuring?: a systematic review. *Br J Clin Pharmacol* 2014;77(3):427-45. doi:  
44 10.1111/bcp.12194 [published Online First: 2013/06/28]  
45  
46  
47 53. Rozich JD, Haraden CR, Resar RK. Adverse drug event trigger tool: a practical methodology  
48 for measuring medication related harm. *Qual Saf Health Care* 2003;12(3):194-200.  
49 [published Online First: 2003/06/07]  
50  
51  
52 54. Golicki D, Niewada M, Karlińska A, et al. Comparing responsiveness of the EQ-5D-5L, EQ-5D-  
53 3L and EQ VAS in stroke patients. *Quality of Life Research* 2015;24(6):1555-63. doi:  
54 10.1007/s11136-014-0873-7  
55  
56  
57

## Figures

Figure 1. Examples of Proportion of days covered calculated using multiple 30 day intervals.

## Supplementary Files

1. SPIRIT checklist
2. Infographic example
3. Participant Information and Consent Form

For peer review only



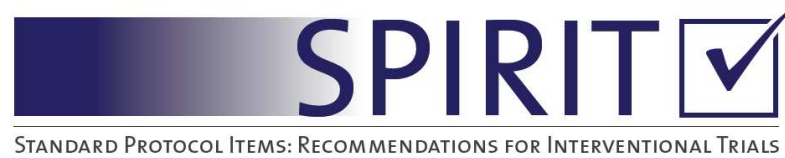

SPIRIT 2013 Checklist: Recommended items to address in a clinical trial protocol and related documents\*

| Section/item                      | Item No | Description                                                                                                                                                                                                                                                                              | Addressed on page number |
|-----------------------------------|---------|------------------------------------------------------------------------------------------------------------------------------------------------------------------------------------------------------------------------------------------------------------------------------------------|--------------------------|
| <b>Administrative information</b> |         |                                                                                                                                                                                                                                                                                          |                          |
| Title                             | 1       | Descriptive title identifying the study design, population, interventions, and, if applicable, trial acronym                                                                                                                                                                             | 1                        |
| Trial registration                | 2a      | Trial identifier and registry name. If not yet registered, name of intended registry                                                                                                                                                                                                     | 1                        |
|                                   | 2b      | All items from the World Health Organization Trial Registration Data Set                                                                                                                                                                                                                 | 1 (20 items in ANZCTR)   |
| Protocol version                  | 3       | Date and version identifier                                                                                                                                                                                                                                                              | Y                        |
| Funding                           | 4       | Sources and types of financial, material, and other support                                                                                                                                                                                                                              | 19                       |
| Roles and responsibilities        | 5a      | Names, affiliations, and roles of protocol contributors                                                                                                                                                                                                                                  | 1                        |
|                                   | 5b      | Name and contact information for the trial sponsor                                                                                                                                                                                                                                       | N/A                      |
|                                   | 5c      | Role of study sponsor and funders, if any, in study design; collection, management, analysis, and interpretation of data; writing of the report; and the decision to submit the report for publication, including whether they will have ultimate authority over any of these activities | N/A                      |
|                                   | 5d      | Composition, roles, and responsibilities of the coordinating centre, steering committee, endpoint adjudication committee, data management team, and other individuals or groups overseeing the trial, if applicable (see Item 21a for data monitoring committee)                         | N/A                      |

1  
2  
3  
4  
5  
6  
7  
8  
9  
10  
11  
12  
13  
14  
15  
16  
17  
18  
19  
20  
21  
22  
23  
24  
25  
26  
27  
28  
29  
30  
31  
32  
33  
34  
35  
36  
37  
38  
39  
40  
41  
42  
43  
44  
45  
46  
47

## Introduction

|                          |    |                                                                                                                                                                                                           |     |
|--------------------------|----|-----------------------------------------------------------------------------------------------------------------------------------------------------------------------------------------------------------|-----|
| Background and rationale | 6a | Description of research question and justification for undertaking the trial, including summary of relevant studies (published and unpublished) examining benefits and harms for each intervention        | 5-6 |
|                          | 6b | Explanation for choice of comparators                                                                                                                                                                     | 5-6 |
| Objectives               | 7  | Specific objectives or hypotheses                                                                                                                                                                         | 7   |
| Trial design             | 8  | Description of trial design including type of trial (eg, parallel group, crossover, factorial, single group), allocation ratio, and framework (eg, superiority, equivalence, noninferiority, exploratory) | 7-8 |

## Methods: Participants, interventions, and outcomes

|                      |     |                                                                                                                                                                                                                                                                                                                                                                                |                 |
|----------------------|-----|--------------------------------------------------------------------------------------------------------------------------------------------------------------------------------------------------------------------------------------------------------------------------------------------------------------------------------------------------------------------------------|-----------------|
| Study setting        | 9   | Description of study settings (eg, community clinic, academic hospital) and list of countries where data will be collected. Reference to where list of study sites can be obtained                                                                                                                                                                                             | 7-8             |
| Eligibility criteria | 10  | Inclusion and exclusion criteria for participants. If applicable, eligibility criteria for study centres and individuals who will perform the interventions (eg, surgeons, psychotherapists)                                                                                                                                                                                   | 8-9             |
| Interventions        | 11a | Interventions for each group with sufficient detail to allow replication, including how and when they will be administered                                                                                                                                                                                                                                                     | 9-11            |
|                      | 11b | Criteria for discontinuing or modifying allocated interventions for a given trial participant (eg, drug dose change in response to harms, participant request, or improving/worsening disease)                                                                                                                                                                                 | N/A             |
|                      | 11c | Strategies to improve adherence to intervention protocols, and any procedures for monitoring adherence (eg, drug tablet return, laboratory tests)                                                                                                                                                                                                                              | N/A             |
|                      | 11d | Relevant concomitant care and interventions that are permitted or prohibited during the trial                                                                                                                                                                                                                                                                                  | 9               |
| Outcomes             | 12  | Primary, secondary, and other outcomes, including the specific measurement variable (eg, systolic blood pressure), analysis metric (eg, change from baseline, final value, time to event), method of aggregation (eg, median, proportion), and time point for each outcome. Explanation of the clinical relevance of chosen efficacy and harm outcomes is strongly recommended | 11-17           |
| Participant timeline | 13  | Time schedule of enrolment, interventions (including any run-ins and washouts), assessments, and visits for participants. A schematic diagram is highly recommended (see Figure)                                                                                                                                                                                               | 17<br>(Figure2) |

1  
2  
3 Sample size 14 Estimated number of participants needed to achieve study objectives and how it was determined, including 8-9  
4 clinical and statistical assumptions supporting any sample size calculations

5 Recruitment 15 Strategies for achieving adequate participant enrolment to reach target sample size 8  
6  
7

8 **Methods: Assignment of interventions (for controlled trials)**  
9

10 Allocation:

11 Sequence generation 16a Method of generating the allocation sequence (eg, computer-generated random numbers), and list of any 8  
12 factors for stratification. To reduce predictability of a random sequence, details of any planned restriction  
13 (eg, blocking) should be provided in a separate document that is unavailable to those who enrol participants  
14 or assign interventions  
15  
16

17 Allocation concealment mechanism 16b Mechanism of implementing the allocation sequence (eg, central telephone; sequentially numbered, 8  
18 opaque, sealed envelopes), describing any steps to conceal the sequence until interventions are assigned  
19  
20

21 Implementation 16c Who will generate the allocation sequence, who will enrol participants, and who will assign participants to 8  
22 interventions  
23

24 Blinding (masking) 17a Who will be blinded after assignment to interventions (eg, trial participants, care providers, outcome 8  
25 assessors, data analysts), and how  
26

27 17b If blinded, circumstances under which unblinding is permissible, and procedure for revealing a participant's 8  
28 allocated intervention during the trial  
29  
30

31 **Methods: Data collection, management, and analysis**  
32

33 Data collection methods 18a Plans for assessment and collection of outcome, baseline, and other trial data, including any related 12-17  
34 processes to promote data quality (eg, duplicate measurements, training of assessors) and a description of  
35 study instruments (eg, questionnaires, laboratory tests) along with their reliability and validity, if known.  
36 Reference to where data collection forms can be found, if not in the protocol  
37

38 18b Plans to promote participant retention and complete follow-up, including list of any outcome data to be 16  
39 collected for participants who discontinue or deviate from intervention protocols  
40  
41  
42  
43  
44



1  
2  
3  
4  
5  
6  
7  
8  
9  
10  
11  
12  
13  
14  
15  
16  
17  
18  
19  
20  
21  
22  
23  
24  
25  
26  
27  
28  
29  
30  
31  
32  
33  
34  
35  
36  
37  
38  
39  
40  
41  
42  
43  
44  
45  
46  
47

|                 |    |                                                                                                                                                                                                                                                                   |       |
|-----------------|----|-------------------------------------------------------------------------------------------------------------------------------------------------------------------------------------------------------------------------------------------------------------------|-------|
| Data management | 19 | Plans for data entry, coding, security, and storage, including any related processes to promote data quality (eg, double data entry; range checks for data values). Reference to where details of data management procedures can be found, if not in the protocol | 18-19 |
|-----------------|----|-------------------------------------------------------------------------------------------------------------------------------------------------------------------------------------------------------------------------------------------------------------------|-------|

|                     |     |                                                                                                                                                                          |       |
|---------------------|-----|--------------------------------------------------------------------------------------------------------------------------------------------------------------------------|-------|
| Statistical methods | 20a | Statistical methods for analysing primary and secondary outcomes. Reference to where other details of the statistical analysis plan can be found, if not in the protocol | 18-19 |
|---------------------|-----|--------------------------------------------------------------------------------------------------------------------------------------------------------------------------|-------|

|  |     |                                                                          |     |
|--|-----|--------------------------------------------------------------------------|-----|
|  | 20b | Methods for any additional analyses (eg, subgroup and adjusted analyses) | N/A |
|--|-----|--------------------------------------------------------------------------|-----|

|  |     |                                                                                                                                                                                 |    |
|--|-----|---------------------------------------------------------------------------------------------------------------------------------------------------------------------------------|----|
|  | 20c | Definition of analysis population relating to protocol non-adherence (eg, as randomised analysis), and any statistical methods to handle missing data (eg, multiple imputation) | 18 |
|--|-----|---------------------------------------------------------------------------------------------------------------------------------------------------------------------------------|----|

**Methods: Monitoring**

|                 |     |                                                                                                                                                                                                                                                                                                                                       |    |
|-----------------|-----|---------------------------------------------------------------------------------------------------------------------------------------------------------------------------------------------------------------------------------------------------------------------------------------------------------------------------------------|----|
| Data monitoring | 21a | Composition of data monitoring committee (DMC); summary of its role and reporting structure; statement of whether it is independent from the sponsor and competing interests; and reference to where further details about its charter can be found, if not in the protocol. Alternatively, an explanation of why a DMC is not needed | 19 |
|-----------------|-----|---------------------------------------------------------------------------------------------------------------------------------------------------------------------------------------------------------------------------------------------------------------------------------------------------------------------------------------|----|

|  |     |                                                                                                                                                                         |    |
|--|-----|-------------------------------------------------------------------------------------------------------------------------------------------------------------------------|----|
|  | 21b | Description of any interim analyses and stopping guidelines, including who will have access to these interim results and make the final decision to terminate the trial | 19 |
|--|-----|-------------------------------------------------------------------------------------------------------------------------------------------------------------------------|----|

|       |    |                                                                                                                                                                                   |    |
|-------|----|-----------------------------------------------------------------------------------------------------------------------------------------------------------------------------------|----|
| Harms | 22 | Plans for collecting, assessing, reporting, and managing solicited and spontaneously reported adverse events and other unintended effects of trial interventions or trial conduct | 19 |
|-------|----|-----------------------------------------------------------------------------------------------------------------------------------------------------------------------------------|----|

|          |    |                                                                                                                                             |     |
|----------|----|---------------------------------------------------------------------------------------------------------------------------------------------|-----|
| Auditing | 23 | Frequency and procedures for auditing trial conduct, if any, and whether the process will be independent from investigators and the sponsor | N/A |
|----------|----|---------------------------------------------------------------------------------------------------------------------------------------------|-----|

**Ethics and dissemination**

|                          |    |                                                                                           |    |
|--------------------------|----|-------------------------------------------------------------------------------------------|----|
| Research ethics approval | 24 | Plans for seeking research ethics committee/institutional review board (REC/IRB) approval | 19 |
|--------------------------|----|-------------------------------------------------------------------------------------------|----|

|                     |    |                                                                                                                                                                                                                                  |     |
|---------------------|----|----------------------------------------------------------------------------------------------------------------------------------------------------------------------------------------------------------------------------------|-----|
| Protocol amendments | 25 | Plans for communicating important protocol modifications (eg, changes to eligibility criteria, outcomes, analyses) to relevant parties (eg, investigators, REC/IRBs, trial participants, trial registries, journals, regulators) | N/A |
|---------------------|----|----------------------------------------------------------------------------------------------------------------------------------------------------------------------------------------------------------------------------------|-----|

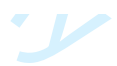

|    |                               |     |                                                                                                                                                                                                                                                                                     |           |
|----|-------------------------------|-----|-------------------------------------------------------------------------------------------------------------------------------------------------------------------------------------------------------------------------------------------------------------------------------------|-----------|
| 1  |                               |     |                                                                                                                                                                                                                                                                                     |           |
| 2  |                               |     |                                                                                                                                                                                                                                                                                     |           |
| 3  | Consent or assent             | 26a | Who will obtain informed consent or assent from potential trial participants or authorised surrogates, and how (see Item 32)                                                                                                                                                        | 8         |
| 4  |                               |     |                                                                                                                                                                                                                                                                                     |           |
| 5  |                               |     |                                                                                                                                                                                                                                                                                     |           |
| 6  |                               | 26b | Additional consent provisions for collection and use of participant data and biological specimens in ancillary studies, if applicable                                                                                                                                               | 19        |
| 7  |                               |     |                                                                                                                                                                                                                                                                                     |           |
| 8  |                               |     |                                                                                                                                                                                                                                                                                     |           |
| 9  | Confidentiality               | 27  | How personal information about potential and enrolled participants will be collected, shared, and maintained in order to protect confidentiality before, during, and after the trial                                                                                                | 18        |
| 10 |                               |     |                                                                                                                                                                                                                                                                                     |           |
| 11 |                               |     |                                                                                                                                                                                                                                                                                     |           |
| 12 | Declaration of interests      | 28  | Financial and other competing interests for principal investigators for the overall trial and each study site                                                                                                                                                                       | N/A       |
| 13 |                               |     |                                                                                                                                                                                                                                                                                     |           |
| 14 |                               |     |                                                                                                                                                                                                                                                                                     |           |
| 15 | Access to data                | 29  | Statement of who will have access to the final trial dataset, and disclosure of contractual agreements that limit such access for investigators                                                                                                                                     | 18        |
| 16 |                               |     |                                                                                                                                                                                                                                                                                     |           |
| 17 |                               |     |                                                                                                                                                                                                                                                                                     |           |
| 18 | Ancillary and post-trial care | 30  | Provisions, if any, for ancillary and post-trial care, and for compensation to those who suffer harm from trial participation                                                                                                                                                       | N/A       |
| 19 |                               |     |                                                                                                                                                                                                                                                                                     |           |
| 20 |                               |     |                                                                                                                                                                                                                                                                                     |           |
| 21 | Dissemination policy          | 31a | Plans for investigators and sponsor to communicate trial results to participants, healthcare professionals, the public, and other relevant groups (eg, via publication, reporting in results databases, or other data sharing arrangements), including any publication restrictions | 20        |
| 22 |                               |     |                                                                                                                                                                                                                                                                                     |           |
| 23 |                               |     |                                                                                                                                                                                                                                                                                     |           |
| 24 |                               |     |                                                                                                                                                                                                                                                                                     |           |
| 25 |                               | 31b | Authorship eligibility guidelines and any intended use of professional writers                                                                                                                                                                                                      | Submitted |
| 26 |                               |     |                                                                                                                                                                                                                                                                                     |           |
| 27 |                               | 31c | Plans, if any, for granting public access to the full protocol, participant-level dataset, and statistical code                                                                                                                                                                     | N/A       |
| 28 |                               |     |                                                                                                                                                                                                                                                                                     |           |
| 29 | <b>Appendices</b>             |     |                                                                                                                                                                                                                                                                                     |           |
| 30 |                               |     |                                                                                                                                                                                                                                                                                     |           |
| 31 | Informed consent materials    | 32  | Model consent form and other related documentation given to participants and authorised surrogates                                                                                                                                                                                  | N/A       |
| 32 |                               |     |                                                                                                                                                                                                                                                                                     |           |
| 33 |                               |     |                                                                                                                                                                                                                                                                                     |           |
| 34 | Biological specimens          | 33  | Plans for collection, laboratory evaluation, and storage of biological specimens for genetic or molecular analysis in the current trial and for future use in ancillary studies, if applicable                                                                                      | N/A       |
| 35 |                               |     |                                                                                                                                                                                                                                                                                     |           |
| 36 |                               |     |                                                                                                                                                                                                                                                                                     |           |

37 \*It is strongly recommended that this checklist be read in conjunction with the SPIRIT 2013 Explanation & Elaboration for important clarification on the items.  
 38 Amendments to the protocol should be tracked and dated. The SPIRIT checklist is copyrighted by the SPIRIT Group under the Creative Commons  
 39 "[Attribution-NonCommercial-NoDerivs 3.0 Unported](https://creativecommons.org/licenses/by-nc-nd/3.0/)" license.  
 40

1  
2  
3  
4  
5  
6  
7  
8  
9  
10  
11  
12  
13  
14  
15  
16  
17  
18  
19  
20  
21  
22  
23  
24  
25  
26  
27  
28  
29  
30  
31  
32  
33  
34  
35  
36  
37  
38  
39  
40  
41  
42  
43  
44  
45  
46  
47  
48  
49  
50  
51  
52  
53  
54  
55  
56  
57  
58  
59  
60

**Medication after a Stroke or TIA**

**Medication after a Stroke or TIA**

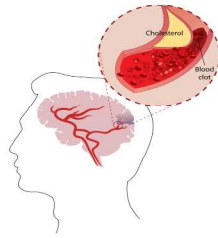

Take your antiplatelet medication called  to lower the risk of blood clots forming in the brain.

Take your cholesterol lowering medication called  to lower the risk of stroke even if your cholesterol is normal.

Take your blood pressure medication called  to lower the risk of stroke.

**Know** about your medications prescribed to reduce the risk of stroke

**Organise** your ongoing supply of your medications

Continue to **take** these medications as agreed with your doctors

**Report** any new symptoms or concerns to your doctor

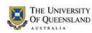

Metro South Health

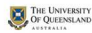

Metro South Health

419x297mm (300 x 300 DPI)

new only

## Participant Information Sheet/Consent Form

|                                                                        |                                                                                                                                      |
|------------------------------------------------------------------------|--------------------------------------------------------------------------------------------------------------------------------------|
| <b>Title</b>                                                           | The use of a patient centred educational exchange model to improve patient's self-management of medicines after a stroke             |
| <b>Short Title</b>                                                     | A conversation with patients about medications after a stroke                                                                        |
| <b>Coordinating Principal Investigator/<br/>Principal Investigator</b> | Mrs Judith Coombes                                                                                                                   |
| <b>Associate Investigators</b>                                         | Associate Professor Neil Cottrell<br>Dr Graham Hall<br>Dr Nabeel Sheikh<br>Dr Leena Aggarwal<br>Ms Marie Williams<br>Ms Debra Rowett |
| <b>Location</b>                                                        | Princess Alexandra Hospital                                                                                                          |

### Part 1 What does my participation involve?

#### Introduction

You are invited to take part in this research project, "A conversation with patients about medications after a stroke." This is because you have been diagnosed with a stroke or Transient Ischemic Attack (TIA). The research project is aiming to test a program designed to educate people about the medications prescribed after they have had a stroke or TIA.

This Participant Information Sheet/Consent Form tells you about the research project. It explains the research involved. Knowing what is involved will help you decide if you want to take part in the research.

Please read this information carefully. Ask questions about anything that you don't understand or want to know more about. Before deciding whether or not to take part, you might want to talk about it with a relative, friend or local doctor.

Participation in any research project is voluntary. If you do not wish to take part, you do not have to. Your decision whether to take part or not to take part, or to take part and then withdraw, will not affect your routine treatment, your relationship with those treating you or your relationship with the Princess Alexandra Hospital.

If you decide you want to take part in the research project, you will be asked to sign the consent section. There are two forms.

By signing the first form, "The study consent form" you are telling us that you:

- Understand what you have read
- Consent to take part in the research project
- Consent to the research that is described

## Princess Alexandra Hospital

• Consent to the use of your personal and health information as described. You will be given a copy of this Participant Information and Consent Form to keep. The second form is “The participant consent form for release of Medicare and PBS data. Here you will be asked to fill out a consent form authorising the study access to your complete Medicare and Pharmaceutical Benefits Scheme (PBS) data as outlined below. Medicare collects information on your medical visits and procedures, and the associated costs, while PBS collects information on the prescription medications you have filled at pharmacies. The consent form is sent securely to the Department of Human Services who holds this information confidentially.

### Definitions of Data used in this study:

#### Medicare (MBS)

- Date of service (*Date that the service was rendered by the provider, to the patient*)
- MBS Item number (*Items Numbers as per the Medicare Benefits Schedule*)
- MBS Item description (*describes the service as per the Medicare Benefits Schedule*)
- Item category (*where the service sits in the hierarchical structure according to the Medicare Benefits Schedule*)

#### Pharmaceutical Benefits Scheme (PBS)

- Date of supply (*Date the prescription was supplied by the pharmacy*)
- Date of Prescribing (*Date that the prescription was prescribed by a Medical Practitioner to a patient*)
- PBS Item Number (*Items Numbers reflected in the Pharmaceutical Benefits Scheme*)
- PBS Item Description (*the item description as noted in the Pharmaceutical Benefits Scheme Book*)
- Patient category e.g. general, concession, safety net, doctor's bag (*Patient's eligibility status at the time of supply*)
- Patient contribution (*the contribution paid by the patient*)
- Form category (*Original or repeat prescription*)
- ATC Code (*the code allocated by the World Health Organisation Collaborating Centre for Drug statistics Methodology*)
- ATC Name (*the group the drug falls under in the Anatomical Therapeutic Chemical (ATC) classification system*)

### What is the purpose of this research?

The purpose of this project is to test a program designed to educate people about the medications people are prescribed after they have a stroke or TIA. The program is designed to improve understanding and organisation of ongoing use of the participants' medications. A total of approximately 200 people will participate in this project.

The results of this research will be used by the study pharmacist, Judith Coombes, to obtain a Doctor of Philosophy (PhD) degree.

### What does participation in this research involve?

Participation will only take place after you have given signed consent.

Participation in this project will involve completing a questionnaire on three or four occasions.

The first will be before you are discharged from hospital, the second will take place over the telephone about 3 months after your discharge from hospital and the third over the telephone at

## Princess Alexandra Hospital

12 months after discharge from hospital. The questionnaire will take about ten minutes to complete. You will be asked about your views of your illness (stroke), your view and opinion of your medicines used for stroke about the way you take your stroke medicines and about your quality of life. There are no right or wrong answers to any of the questions in the interview; it is your view and opinion that is important.

About half of the participants in this study will be chosen by chance (random), to have a longer interview with the researcher to have a conversation about their stroke medications prior to their discharge from hospital. This will take about a further ten minutes. These participants will also be contacted by telephone 7-10 days after discharge from hospital. The telephone call will last for about 10 minutes. The telephone call will involve completing the questionnaire and an opportunity to follow-up on any questions they may have about their medicines.

You will also be asked for consent for the release of your Medicare/PBS claims information.

### **What are the possible benefits of taking part?**

No payment will be provided for participation in this study. We cannot guarantee or promise that you will receive any benefits from this research; however possible benefits may include better understanding of the medications you are using to reduce the risk of a further stroke. It may also help you to organise ongoing use of your medications.

### **What are the possible risks and disadvantages of taking part?**

This study involves completing a questionnaire and for about half the participants discussing your stroke medications through one face to face interview and one telephone call. There is no foreseeable added risk to you above the risks of everyday living.

### **What if I wish to withdraw from this research project?**

If you decide to take part and later change your mind, you are free to withdraw from this research project at any stage. You can ask to withdraw during the interview or you can inform Mrs Judith Coombes your desire to withdraw by telephone on 3346 1944 or 0428814397, email [Judith@pharmacy.uq.edu.au](mailto:Judith@pharmacy.uq.edu.au) or by mail addressed to Judith Coombes, Pharmacy Department, Princess Alexandra Hospital, Ipswich Rd, Woolloongabba QLD 4102.

If you do withdraw your consent during the research project, the investigator will not collect additional information from you or about you, although information already collected will be retained to ensure that the results of the research project can be measured properly. You should be aware that data collected up to the time you withdraw will form part of the research project results. If you do not want the researcher to do this, you must tell the researcher.

### **What happens when the research project ends?**

You may request the study results when it is completed by providing an address that the report can be sent to or at a later date by contacting Judith Coombes (contact details above).

## **Part 2 How is the research project being conducted?**

### **What will happen to information about me?**

By signing the consent form you consent to the study pharmacist collecting and using personal information about you for the research project. Information about you may be obtained from your health records held at this hospital for the purpose of this research. By signing the consent

## Princess Alexandra Hospital

form you agree to the research team accessing health records if they are relevant to your participation in this research project.

Any information obtained in connection with this research project that can identify you will remain confidential. In all reports from this research, information will be provided in such a way that you cannot be identified.

The information collected on paper will be stored in a locked filing cabinet in a locked office, with access only to the principal investigator stated above. Both written and electronic information containing confidential data will be stored for a period of seven years after publication of the final report or for 10 years, whichever is earlier, and then destroyed.

### Who is organising and funding the research?

This research project is being conducted by *Mrs Judith Coombes, Associate Professor Neil Cottrell and Dr Graham Hall, Dr Nabeel Sheikh, Dr Leena Aggarwal, Ms Marie Williams, Ms Debra Rowett and Associate Professor Jenny Whitty*

Mrs Coombes, Associate Professor Cottrell, Ms Rowett and Associate Professor Whitty are affiliated with the School of Pharmacy at The University of Queensland and Dr Hall, Dr Sheikh, Dr Aggarwal, Ms Williams and Mrs Coombes are affiliated with the Princess Alexandra Hospital.

### Who has reviewed the research project?

All research in Australia involving humans is reviewed by an independent group of people called a Human Research Ethics Committee (HREC). The ethical aspects of this research project have been approved by the HREC of *The Princess Alexandra Hospital*. This study adheres to the Guidelines of the ethical review process of the University of Queensland.

This project will be carried out according to the *National Statement on Ethical Conduct in Human Research (2007)*. This statement has been developed to protect the interests of people who agree to participate in human research studies.

## 11 Who to contact

If you have any queries or any problems concerning this research project, please contact

|           |                                                                                    |
|-----------|------------------------------------------------------------------------------------|
| Name      | Judith Coombes                                                                     |
| Position  | <i>Advanced Pharmacist Education</i>                                               |
| Telephone | <i>0428814397, 33461944 or contact the switchboard 3176 2111 pager number 8009</i> |
| Email     | <i>Judith@pharmacy.uq.edu.au</i>                                                   |

If you would like to speak to an officer not involved in the study or if you have any complaints about any aspect of the project, the way it is being conducted or any questions about being a research participant in general, then you may contact:

## Princess Alexandra Hospital

---

|           |                                                                                                      |
|-----------|------------------------------------------------------------------------------------------------------|
| Position  | Coordinator, Metro South Hospital and Health Service Human Research Ethics Committee                 |
| Telephone | 3343 8049                                                                                            |
| Email     | <a href="mailto:ethicsresearch.pah@health.qld.gov.au">ethicsresearch.pah@health.qld.gov.au</a><br>or |
| Position  | Human Ethics Unit Coordinator, University of Queensland                                              |
| Telephone | 3365 3924                                                                                            |



1  
2  
3  
4  
5  
6  
7  
8  
9  
10  
11  
12  
13  
14  
15  
16  
17  
18  
19  
20  
21  
22  
23  
24  
25  
26  
27  
28  
29  
30  
31  
32  
33  
34  
35  
36  
37  
38  
39  
40  
41  
42  
43  
44  
45  
46  
47  
48  
49  
50  
51  
52  
53  
54  
55  
56  
57  
58  
59  
60

Princess Alexandra Hospital

---

For peer review only

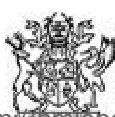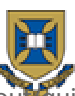

# Study Consent Form

**Title**

The use of a patient centred educational exchange model to improve patient's self-management of medicines after a stroke

**Short Title**

A conversation with patients about medications after a stroke

**Coordinating Principal Investigator/  
Principal Investigator**

Mrs Judith Coombes

**Associate Investigators**

Associate Professor Neil Cottrell  
Dr Graham Hall  
Dr Nabeel Sheikh  
Dr Leena Aggarwal  
Ms Marie Williams  
Ms Debra Rowett

**Location**

Princess Alexandra Hospital

**Declaration by Participant**

I have read the Participant Information Sheet or someone has read it to me in a language that I understand.

I understand the purposes, procedures and risks of the research described in the project.

I have had an opportunity to ask questions and I am satisfied with the answers I have received.

I freely agree to participate in this research project as described and understand that I am free to withdraw at any time during the project without affecting my future health care.

I understand that I will be given a signed copy of this document to keep.

Name of Participant (please print) \_\_\_\_\_

Signature \_\_\_\_\_ Date \_\_\_\_\_

Name of Witness\* to  
Participant's Signature (please print) \_\_\_\_\_

Signature \_\_\_\_\_ Date \_\_\_\_\_

\* Witness is not to be the investigator, a member of the study team or their delegate. In the event that an interpreter is used, the interpreter may not act as a witness to the consent process. Witness must be 18 years or older.

**Declaration by Senior Researcher**

I have given a verbal explanation of the research project, its procedures and risks and I believe that the participant has understood that explanation.

Name of Senior Researcher  
(please print) \_\_\_\_\_

Signature \_\_\_\_\_ Date \_\_\_\_\_

Note: All parties signing the consent section must date their own signature.

# Form for Withdrawal of Participation -

1  
2  
3  
4 Title The use of a patient centred educational  
5 exchange model to improve patient's self-  
6 management of medicines after a stroke  
7  
8 Short Title A conversation with patients about medications  
9 after a stroke  
10  
11 Coordinating Principal Investigator/ Principal Mrs Judith Coombes  
12 Investigator  
13  
14 Associate Investigators Associate Professor Neil Cottrell  
15 Dr Graham Hall  
16 Dr Nabeel Sheikh  
17 Dr Leena Aggarwal  
18 Ms Marie Williams  
19 Ms Debra Rowett  
20 Associate Professor Jenny Whitty  
21 Location Princess Alexandra Hospital

## **Declaration by Participant**

24 I wish to withdraw from participation in the above research project and understand that such  
25 withdrawal will not affect my routine treatment, my relationship with those treating me or my  
26 relationship with Princess Alexandra Hospital  
27

28  
29 Name of Participant (please print) \_\_\_\_\_  
30  
31 Signature \_\_\_\_\_ Date \_\_\_\_\_  
32  
33  
34  
35  
36  
37  
38  
39  
40  
41  
42  
43  
44  
45  
46  
47  
48  
49  
50  
51  
52  
53  
54  
55

**Participant ID:**

**PARTICIPANT CONSENT FORM FOR RELEASE OF MBS/PBS DATA**

Consent to release of Medicare and/or Pharmaceutical Benefits Scheme (PBS) claims information for the purposes of “The use of a patient centred educational exchange model to improve patient’s self-management of medicines after a stroke” Study

**Important Information**

Complete this form to request the release of personal Medicare claims information and/or PBS claims information to “The use of a patient centred educational exchange model to improve patient’s self-management of medicines after a stroke” study.  
 Any changes to this form must be initialled by the signatory. Incomplete forms may result in the study not being provided with your information.  
 By signing this form, I acknowledge that I have been fully informed and have been provided with information about this study. I have been given an opportunity to ask questions and understand the possibilities of disclosures of my personal information.

**PARTICIPANT DETAILS**

1. Mr  Mrs  Miss  Ms  Other   
 Family name: \_\_\_\_\_ First given name: \_\_\_\_\_  
 Other given name (s): \_\_\_\_\_  
 Date of birth: DD/MM/YYYY  
 2. Medicare card number: \_\_\_\_\_  
 3. Permanent address: \_\_\_\_\_  
 Postal address (if different to above): \_\_\_\_\_

**AUTHORISATION**

4. I authorise the Department of Human Services to provide my:

- Medicare claims history OR
- PBS claims history OR
- Medicare & PBS claims history

for the period 01/07/2014 to: 31/10/2018 to “The use of a patient centred educational program to improve patient’s self-management of medicines after a stroke” Study.

\*Note: The Department of Human Services can only extract 4.5 years of data (prior to the date of extraction). The consent period above may result in multiple extractions.

**DECLARATION**

I declare that the information on this form is true and correct.

5. Signed: \_\_\_\_\_ (participant’s signature) Dated: DD/MM/YYYY OR  
 6. Signed by \_\_\_\_\_ (full name) \_\_\_\_\_ (signature) on behalf of participant  
 Dated: DD/MM/YYYY  
 Power of attorney\*\*       Guardianship order\*\*

\*\* Please attach supporting evidence

**APP 5 – PRIVACY NOTICE**

Your personal information is protected by law, including the Privacy Act 1988, and is collected by the Australian Government Department of Human Services. The collection of your personal information by the department is necessary for administering requests for statistical and other data.

Your information may be used by the department or given to other parties for the purposes of research, investigation or where you have agreed or it is required or authorised by law.

You can get more information about the way in which the Department of Human Services will manage your personal information, including our privacy policy at [humanservices.gov.au/privacy](http://humanservices.gov.au/privacy) or by requesting a copy from the department.

**Power of attorney** – A power of attorney is a document that appoints a person to act on behalf of another person who grants that power. In particular, an enduring power of attorney allows the appointed person to act on behalf of another person even when that person has become mentally incapacitated. The powers under a power of attorney may be unlimited or limited to specific acts.

**Guardianship order** – A Guardianship order is an order made by a Guardianship Board/Tribunal that appoints a guardian to make decisions for another person. A Guardianship order may be expressed broadly or limited to particular aspects of the care of another person.

### A sample of the information that may be included in your Medicare claims history:

| Date of service | Item number | Item description     | Provider charge | Schedule Fee | Benefit paid | Patient out of pocket | Bill type |
|-----------------|-------------|----------------------|-----------------|--------------|--------------|-----------------------|-----------|
| 20/04/09        | 00023       | Level B consultation | \$38.30         | \$34.30      | \$34.30      | \$4.00                | Cash      |
| 22/06/09        | 11700       | ECG                  | \$29.50         | \$29.50      | \$29.50      |                       | Bulk Bill |

| Scrambled ordering Provider number* | Scrambled rendering Provider number* | Date of referral | Rendering Provider postcode | Ordering Provider postcode | Hospital indicator | Item category |
|-------------------------------------|--------------------------------------|------------------|-----------------------------|----------------------------|--------------------|---------------|
|                                     | 999999A                              |                  | 2300                        |                            | N                  | 1             |
| 999999A                             | 999999A                              | 20/04/09         | 2300                        | 2302                       | N                  | 2             |

\* Scrambled Provider number refers to a unique scrambled provider number identifying the doctor who provided/referred the service. Generally, each individual provider number will be scrambled and the identity of that provider will not be disclosed.

### A sample of the information that may be included in your PBS claims history:

| Date of supply | Date of prescribing | PBS item code | Item description      | Patient category      | Patient contribution (this includes under copayment amounts**) | Net Benefit (this includes under copayment amounts**) | Scrambled Prescriber number* | Pharmacy postcode |
|----------------|---------------------|---------------|-----------------------|-----------------------|----------------------------------------------------------------|-------------------------------------------------------|------------------------------|-------------------|
| 06/03/09       | 01/03/09            | 03133X        | Oxazepam Tablet 30 mg | Concessional Ordinary | \$5.30                                                         | \$25.55                                               | 9999999                      | 2560              |
| 04/07/09       | 28/05/09            | 03161J        | Diazepam Tablet 2 mg  | General Ordinary      | \$30.85                                                        |                                                       | 9999999                      | 2530              |

| Form Category | ATC Code   | ATC Name |
|---------------|------------|----------|
| Original      | N05 B A 04 | Oxazepam |
| Repeat        | N05 B A 01 | Diazepam |

\* Scrambled Prescriber number refers to a unique scrambled prescriber number identifying the doctor who prescribed the prescription. Generally, each individual prescriber number will be scrambled and the identity of that prescriber will not be disclosed.

\*\* Under co-payments can now be provided for data after 1 June 2012

# BMJ Open

## The use of a patient centred educational exchange (PCEE) to improve patient's self-management of medicines after a stroke; a randomised controlled trial study protocol.

|                                 |                                                                                                                                                                                                                                                                                                                                                                                                                                                                                   |
|---------------------------------|-----------------------------------------------------------------------------------------------------------------------------------------------------------------------------------------------------------------------------------------------------------------------------------------------------------------------------------------------------------------------------------------------------------------------------------------------------------------------------------|
| Journal:                        | <i>BMJ Open</i>                                                                                                                                                                                                                                                                                                                                                                                                                                                                   |
| Manuscript ID                   | bmjopen-2018-022225.R1                                                                                                                                                                                                                                                                                                                                                                                                                                                            |
| Article Type:                   | Protocol                                                                                                                                                                                                                                                                                                                                                                                                                                                                          |
| Date Submitted by the Author:   | 13-Jul-2018                                                                                                                                                                                                                                                                                                                                                                                                                                                                       |
| Complete List of Authors:       | Coombes, Judith; University of Queensland, School Of Pharmacy; Princess Alexandra Hospital, Pharmacy<br>Rowett, Debra; University of South Australia School of Pharmacy and Medical Sciences, School of Pharmacy and Medical Sciences; Flinders Medical Centre, DATIS<br>Whitty, Jennifer; University of East Anglia Norwich Medical School, School of Pharmacy; University of Queensland, School of Pharmacy<br>Cottrell, Neil; The University of Queensland, School of Pharmacy |
| <b>Primary Subject Heading</b>: | Patient-centred medicine                                                                                                                                                                                                                                                                                                                                                                                                                                                          |
| Secondary Subject Heading:      | Communication, Cardiovascular medicine, Health services research, Pharmacology and therapeutics, Research methods                                                                                                                                                                                                                                                                                                                                                                 |
| Keywords:                       | Adherence, Stroke < NEUROLOGY, secondary prevention, medication, academic detailing, STROKE MEDICINE                                                                                                                                                                                                                                                                                                                                                                              |
|                                 |                                                                                                                                                                                                                                                                                                                                                                                                                                                                                   |

SCHOLARONE™  
Manuscripts

1  
2  
3  
4  
5 Protocol Paper V2-0  
6  
7  
8  
9

10 Title

11  
12 The use of a patient centred educational exchange (PCEE) to improve patient's self-  
13 management of medicines after a stroke; a randomised controlled trial study protocol.  
14  
15

16 Lay title: A conversation with patients about medications after a stroke  
17  
18

19 ACTRN12615000888561  
20

21 Protocol Authors:  
22  
23

24 Judith Coombes,  
25 School of Pharmacy, University of Queensland,  
26 20 Cornwall St, Woolloongabba Queensland 4102, Australia  
27 Princess Alexandra Hospital  
28 Ipswich Rd, Woolloongabba Queensland 4102, Australia  
29 ORCID 0000-0003-4871-7783  
30  
31

32 Debra Rowett  
33 School of Pharmacy and Medical Sciences, University of South Australia  
34 Playford Building, North Terrace, Adelaide SA 5000  
35 DATIS, Southern Adelaide Local Health Network  
36 Flinders Medical Centre, Flinders Drive, South Australia 5042, Australia  
37 ORCID 0000-0002-8977-0401  
38  
39

40 Jennifer A Whitty  
41 Norwich Medical School, University of East Anglia,  
42 Norwich NR4 7TJ, United Kingdom  
43 School of Pharmacy, University of Queensland,  
44 20 Cornwall St, Woolloongabba Queensland 4102, Australia  
45 ORCID 0000-0002-5886-1933  
46  
47

48 W Neil Cottrell  
49 School of Pharmacy, University of Queensland,  
50 20 Cornwall St, Woolloongabba Queensland 4102, Australia  
51 ORCID 0000-0002-0149-444X  
52  
53

54 Corresponding Author:

55 Judith Coombes

56 Email [Judith@pharmacy.uq.edu.au](mailto:Judith@pharmacy.uq.edu.au)  
57

58  
59 1 Protocol v2.030435814\_File000004\_710802920.docx

60 For peer review only - <http://bmjopen.bmj.com/site/about/guidelines.xhtml>

1  
2  
3 School of Pharmacy, University of Queensland,  
4 20 Cornwall St, Woolloongabba Queensland 4102  
5 Australia  
6

7 Phone +61 439557748  
8 Fax+61 7 31762800  
9

10  
11  
12  
13  
14  
15  
16  
17  
18  
19  
20  
21  
22  
23  
24  
25  
26  
27  
28  
29  
30  
31  
32  
33  
34  
35  
36  
37  
38  
39  
40  
41  
42  
43  
44  
45  
46  
47  
48  
49  
50  
51  
52  
53  
54  
55  
56  
57  
58  
59  
60

For peer review only



## Abstract

### Introduction:

National and international guidelines make recommendations for secondary prevention of stroke including the use of medications. A strategy which engages patients in a conversation to personalise evidence based educational material (patient centred educational exchange (PCEE)) may empower patients to better manage their medications.

### Methods and analysis:

This protocol outlines a non-blinded randomised controlled trial (RCT). Consenting patients admitted with a diagnosis of stroke or transient ischemic attack (TIA) will be randomized 1:1 to receive either a patient centred educational exchange (PCEE) comprised of two sessions, one at the bedside before discharge and one by telephone at least ten days after discharge from hospital in addition to usual care (intervention) or usual care alone (control). The primary aim of this study is to determine whether a PCEE improves adherence to antithrombotic, antihypertensive and lipid lowering medications prescribed for secondary prevention of stroke over the three months after discharge, measured using prescription refill data. Secondary aims include: investigation of the impact of the PCEE on adherence over 12 months using prescription refill data, self-reported medication taking behaviour, self-reported clinical outcomes (blood pressure, cholesterol, adverse medication events, and readmission), quality of life, the cost utility of the intervention and changes in beliefs towards medicines and illness.

### Ethics and Dissemination:

Communication of the trial results will provide evidence to aid clinicians in conversations with patients about medication taking behaviour related to stroke prevention. The targeted audiences will be health practitioners and consumers interested in medication taking behaviour in chronic diseases and in particular those interested in secondary prevention of stroke.

The Australian New Zealand Clinical Trials Registry number is ACTRN12615000888561. The trial has ethics approval from Metro South Human Research Ethics Committee

1  
2  
3 (HREC/15/QPAH/531) and The University of Queensland Institutional Human Research  
4 Ethics (2015001612).  
5  
6  
7

## 8 **Strengths and Limitations**

9  
10  
11

- 12 • The design of a randomising participants to the PCEE will provide the opportunity to  
13 take into account other changes which may occur across the time of the study.  
14
- 15 • The use of questionnaires, validated as research tools, to elicit patient perceptions  
16 will be integrated with the approach used in “academic detailing”.  
17
- 18 • The strength of the intervention is that it is underpinned by a combination of  
19 theories of behaviour change.  
20
- 21 • This study links the use of both prescription refill data as an objective adherence  
22 measurement and patient self-reported adherence.  
23
- 24 • As is common with many behavioural intervention studies, this study is not blinded  
25 once the participant has been allocated to either the intervention or control group,  
26 which may introduce bias to the study.  
27  
28  
29  
30  
31  
32  
33  
34  
35  
36  
37  
38  
39  
40  
41  
42  
43  
44  
45  
46  
47  
48  
49  
50  
51  
52  
53  
54  
55  
56  
57  
58

## Introduction

Stroke is one of the leading causes of death worldwide<sup>1,2</sup>. About a third of those who suffer from a stroke die within 28 days and a further third are left permanently disabled placing a burden on themselves, their family and the community<sup>3,4</sup>. After an initial stroke the cumulative incidence of a subsequent stroke is about 30%, with the highest occurrence in the first 12 months (12%).<sup>5-7</sup> In an individual experiencing a transient ischaemic attack (TIA) or a minor stroke (<3 on the National Institutes of Health Stroke Scale<sup>8</sup>) the 30 day incidence of stroke is 11-15%.<sup>9</sup> After either a stroke or TIA, International<sup>10-12</sup> and Australian guidelines<sup>13</sup> recommend secondary prevention strategies. Recommendations include the use of antithrombotic therapy, medications for blood pressure lowering and cholesterol lowering medications. The high rate of recurrence in the first weeks and months of a minor stroke or TIA emphasises the importance of early initiation and subsequent persistence to secondary prevention medicines to reduce the risk of subsequent stroke.<sup>9</sup> Stroke survivors may not benefit due to poor adherence to the medications<sup>14-16</sup> or the benefit may be offset by the occurrence of adverse drug events (ADEs).<sup>17</sup> Reports of patient adherence to secondary prevention medications vary widely ranging from 40%<sup>14</sup> to 86%<sup>15</sup> and are influenced by the timing and method of measurement. There are many reasons reported for reduction in adherence including: lower income, multiple co-morbidities, minor stroke or TIA,<sup>18</sup> forgetfulness, trivialising stroke and low necessity beliefs in taking medications.<sup>19</sup>

Educational interventions focused on improving patient use of medications for secondary prevention of stroke have shown impact on patients' knowledge but other outcome measures have had varied results.<sup>20-22</sup> Debate centres on whether a change in knowledge will result in a change of medicine taking behaviour or whether alternative approaches such as addressing necessities and concerns about medication,<sup>23</sup> agreeing goals, or providing key messages about medication taking will be more effective in changing behaviour. Previously validated questionnaires have been used to identify patients' perceptions of their illness,<sup>24</sup> beliefs about medications<sup>25</sup> and medication taking behaviour<sup>26</sup> and these have been used to provide a structure to encourage patient input into a personalised intervention.<sup>27</sup> Another approach to empower patients in medication related self-management has incorporated "academic detailing"<sup>28,29</sup> also described as "educational visiting".<sup>30,31</sup> Academic detailing

1  
2  
3 uses a social marketing framework, to encourage information exchange while delivering key  
4 messages in order to influence behaviour. The approach includes the following key features:  
5  
6 identifying baseline knowledge and motivations for medication use, defining clear  
7  
8 educational and behavioural objectives, establishing credibility, referring to authoritative  
9  
10 sources of information, and presenting both sides of controversial issues, stimulating  
11  
12 participation in educational interactions, using concise graphic educational materials,  
13  
14 highlighting and repeating the essential messages and providing positive reinforcement of  
15  
16 improved practices in follow-up communication.<sup>28</sup>

17  
18 Combining these two strategies, identifying patients perceptions' and beliefs' then using  
19  
20 these to personalise educational messages and to engage patients in a conversation, may  
21  
22 empower patients to better manage their medications. This approach will be referred to as a  
23  
24 patient centred educational exchange (PCEE). The PCEE has been tested for feasibility, and  
25  
26 was found to be acceptable to the participants, manageable for the health care professional  
27  
28 and the beliefs and perceptions elicited by the questionnaires were able to be used to  
29  
30 personalise the conversation.<sup>32</sup> A limitation of this feasibility study was that because the  
31  
32 researcher delivered the intervention, the training requirements, use of resources and  
33  
34 opinions of staff were not evaluated. The impact of the PCEE on patient self-management of  
35  
36 stroke prevention medications has yet to be determined.  
37  
38  
39  
40  
41  
42  
43  
44  
45  
46  
47  
48  
49  
50  
51  
52  
53  
54  
55  
56  
57  
58  
59  
60

1  
2  
3 **Aim:** The primary aim of this study is to determine whether a patient centred educational  
4 exchange (PCEE) improves adherence to antithrombotic, antihypertensive and lipid lowering  
5 medications prescribed for secondary prevention of stroke over the three months after  
6 discharge, measured using prescription refill data.  
7  
8

9  
10 Secondary aims include: investigation of the impact of the PCEE on adherence over 12  
11 months using prescription refill data, self-reported medication taking behaviour, self-  
12 reported clinical outcomes (blood pressure, cholesterol, adverse medication events, and  
13 readmission), quality of life, the cost utility of the intervention and changes in beliefs  
14 towards medicines and illness.  
15  
16

17  
18 To address these aims we will conduct a randomised controlled trial, with an intervention  
19 comprised of two PCEE sessions; one before discharge from hospital and one by telephone  
20 at least ten days after discharge.  
21  
22  
23  
24  
25

## 26 **Methods and Analysis**

27  
28 This protocol was developed in accordance with the Standard Protocol Items:  
29 recommendations for intervention trials (SPIRIT) statement (see online supplementary file 1.  
30 SPIRIT checklist).  
31  
32  
33

### 34 **Study Design**

35  
36 This study is a non-blinded randomised controlled trial (RCT). Participants will be  
37 randomised 1:1 to either the intervention group (intervention and usual care) or the control  
38 group (usual care).  
39  
40  
41  
42

### 43 **Setting**

44  
45 The setting will be the "Medical Stroke Unit" (MSU) or the Medical Admission and Planning  
46 Unit (MAPU), of an Australian tertiary referral hospital.  
47  
48  
49

### 50 **Study Population**

51  
52 Inclusion criteria: Participants recruited to this study must be aged 18 years or older, have  
53 been admitted to the MSU or the MAPU with a principal diagnosis of stroke or TIA, and are  
54 planned to be discharged to their home.  
55  
56  
57  
58

1  
2  
3 The participant should be expecting to manage their own medication after discharge home,  
4 have a documented Mental Status Questionnaire (MSQ)<sup>33</sup> score of 10/10 at the time of  
5 recruitment and be able to provide consent. The consent form requires the researcher to  
6 sign a declaration saying that they have given a verbal explanation of the research project, its  
7 procedures and risks, and believe that the participant has understood that explanation. This  
8 means the participant is unlikely to have severe problems with verbal communication.  
9  
10  
11  
12

13  
14 Exclusion criteria: Those patients planned for discharge to a residential care facility (for  
15 example a nursing or residential care home) where a staff member is responsible for the  
16 patients' medication administration, those patients who have been planned for a  
17 rehabilitation period of greater than one month as they will be having weekly education  
18 sessions, those with an MSQ<10, unable to complete the questionnaire (even) with  
19 assistance (this may be due to language difficulties or cognitive impairment) and those who  
20 do not provide consent. Those who are excluded will receive standard care, which includes  
21 education, without incurring any disadvantage.  
22  
23  
24  
25  
26  
27  
28  
29  
30

### 31 **Patient and Public involvement**

32  
33 A feasibility study<sup>32</sup> was conducted to inform the design of the PCEE used in this  
34 randomised controlled trial. Ten of the 18 participants completed an evaluation of the  
35 proposed intervention which resulted in changes to the final protocol. This included  
36 improved graphics to be used in this study, the use of mobile telephones with messaging to  
37 facilitate follow up calls, and bridging sentences between questionnaires and the use of the  
38 infographic. With respect to the burden of the intervention, seven of the ten indicated that  
39 the session was not too long or too short and 9/10 agreed that the materials helped them.  
40 The participants were invited to ask a questions and prompted to discuss previous  
41 experiences as part of the feasibility study, this has been included in the current protocol.  
42  
43  
44  
45  
46  
47  
48  
49

50 Patients and public were not involved in development of the research question or outcome  
51 measures, they will not be involved in the recruitment or ongoing conduct of the current  
52 study. The participants will be given contact details to request the results of the study.  
53  
54

### 55 **Recruitment**

1  
2  
3 All admissions to MSU and MAPU will be screened using “bed lists” for five days of every  
4 week. Those admissions with a diagnosis of stroke or TIA will be further screened for a  
5 documented MSQ of 10/10 and plan for further rehabilitation or discharge to home. The  
6 researcher will then approach the potential participants on the ward to determine whether  
7 they are willing to participate in the study.  
8  
9

10  
11  
12 **Allocation/Randomisation:** The allocation of participants to control or intervention will be  
13 concealed until the participant has been consented to reduce allocation bias. After the  
14 participant has consented to the study the research pharmacist will contact the clinical trials  
15 pharmacist, who is not involved in the study and who will identify the allocation, one to one,  
16 to either the intervention or control group. The allocation will be previously determined  
17 using a computer generated four block randomisation code using Sealed Envelope Ltd™<sup>34</sup>.  
18 The allocation will be concealed by placing the allocation in sealed opaque envelopes stored  
19 in the clinical trials office of the pharmacy department.  
20  
21  
22  
23  
24  
25

26  
27 Once the participant is allocated the researcher will no longer be blinded to participant’s  
28 allocation. The reason the researcher will no longer be blinded is that the researcher will  
29 conduct the intervention and follow-up calls.  
30  
31

32  
33 **Sample size-** The primary outcome is adherence measured by the proportion of days  
34 covered (PDC) (defined as the days of medication supplies when the medications were  
35 collected divided by the days in the time interval) over the three months after discharge,  
36 using prescription refill data for three classes of medications (antithrombotic,  
37 antihypertensive and lipid lowering medications).  
38  
39  
40

41  
42 The sample size calculation used the criterion for significance (alpha) set at 0.05 and the  
43 power (beta) at 80%. It is proposed that the intervention will result in a 7% improvement in  
44 adherence compared to standard care. This difference of 7% was selected as reasonable;  
45 because an effect of this magnitude has been shown with secondary prevention  
46 medications used for cardiovascular diseases<sup>35 36</sup> and has been linked to a clinical difference  
47 <sup>37</sup>. An effect size of 0.54 (0.07/0.13) was selected using results from a study conducted with  
48 participants discharged on similar medications after a diagnosis of acute coronary  
49 syndrome<sup>36</sup>. A sample size of 55 in each arm is required for effect size of 0.54. We allowed  
50 for a slighter larger pooled standard deviation of 0.15 (effect size 0.7/.15= 0.47) requiring a  
51  
52  
53  
54  
55  
56  
57  
58

1  
2  
3 sample size of n= 73. Adherence data is likely to be skewed <sup>38</sup> and so will not fulfil the  
4 requirements for a parametric test. Lehmann <sup>39</sup> suggests the addition of 15% more  
5 participants (n=84) when planning to use non-parametric tests such as the Mann Whitney.  
6 Assuming attrition rates of approximately 10% we would need to enrol at least 92  
7 participants for each group; we propose to include 100 participants in each arm. It is  
8 predicted that approximately two participants will be recruited per week, estimating a two  
9 year recruitment period. The first participant was recruited on the 18<sup>th</sup> December 2015 and  
10 the study will be ongoing until April 2019.

### 17 **Procedure**

18  
19 Both the intervention and control group will receive usual care. In addition to usual care  
20 participants in the intervention group will receive two sessions of a "PCEE", one before  
21 discharge and one by telephone at least ten days after discharge. These sessions will be  
22 conducted by a clinical pharmacist who attends weekly multidisciplinary MSU meetings, has  
23 a postgraduate qualification in clinical pharmacy (MSc ClinPharm) and training in academic  
24 detailing. In this study the intervention pharmacist will also be collecting the study data.

### 31 Usual Care

32  
33 Usual care includes admission to a stroke specific ward, multidisciplinary care by the stroke  
34 team, education using Stroke Foundation-Australia materials by the stroke nurse<sup>40</sup>, clinical  
35 pharmacy services provided by the ward pharmacist and discharge advice provided by the  
36 medical staff. Usual care provided by the ward pharmacist includes medication history  
37 taking and reconciliation, medication review during the admission, discharge reconciliation,  
38 provision of a medication list<sup>41</sup> and medication counselling at discharge.

### 44 *Control Group*

45  
46 The control group will receive usual care as described above.

### 50 Intervention - Patient centred educational exchange (PCEE)

51  
52 The intervention consists of two sessions, one which will take place at the patients' bedside  
53 before the usual pharmacist discharge counselling and the second which will be conducted  
54 over the telephone at least ten days after discharge. These sessions are additional to, and  
55  
56  
57



1  
2  
3 designed to integrate with, usual care. The PCEE is structured with an introduction,  
4 conversation and conclusion.  
5

6  
7 The session begins with an “introduction” phase establishing credibility “*I am a pharmacist*  
8 *with an interest in patients taking medication to reduce the risk of stroke*”. Next the clinical  
9 pharmacist will give the opportunity to the patient to ask a question. “*What one thing*  
10 *would you most like to discuss about medications you have been prescribed since your*  
11 *stroke/TIA?*” There is an opportunity to answer this question before moving on.  
12  
13  
14  
15

16 The session will then move into the “conversation”- using previously validated  
17 questionnaires to identify patients’ perceptions, beliefs and concerns about their stroke in  
18 general (using the brief-Illness Perception Questionnaire (brief- IPQ)<sup>24</sup>) and medications in  
19 particular (using the Beliefs about Medicine questionnaire specific (BMQ-specific)<sup>25</sup>). There  
20 is also an opportunity for the patient to self-report their previous medication taking  
21 behaviour for the medications of interest (using the Medication Adherence Questionnaire  
22 (MAQ)<sup>26</sup>). The identified barriers and enablers will be used to personalise the conversation.  
23 A double sided single page document will be personalised and given to the participant (the  
24 detailing tool). The detailing tool contains an infographic to help illustrate the discussion  
25 about the stroke prevention medications the patient has been prescribed on one side, and  
26 four a-priori key messages on the other side (see online supplementary file 2. infographic  
27 example).  
28  
29  
30  
31  
32  
33  
34  
35  
36  
37

38 The four key messages are: “**Know** about your medications prescribed to reduce risk of  
39 stroke”, “**Organise** ongoing supply of your medications”, “Continue to **take** these  
40 medications as agreed with your doctors” and “**Report** any new symptoms or concerns to  
41 your doctor”.  
42  
43  
44

45 In the final phase, “conclusion”, items identified to be discussed when the clinical  
46 pharmacist telephones the patient will be listed.  
47  
48  
49

50 To provide an opportunity for “follow-up” and reinforcement of key messages, the  
51 intervention is designed to include two sessions. The clinical pharmacist arranges to  
52 telephone the participant at least ten days after discharge to ask them the same questions  
53 and to talk about their medications.  
54  
55  
56  
57  
58

1  
2  
3 It is hypothesised that patients in the intervention group will be influenced to organise  
4 ongoing supply of their medications and take their medications as prescribed. In addition, it  
5 is hoped that if they identify that they are experiencing unwanted effects from a  
6 medication(s) they will not keep taking medication(s) long term, rather discuss their  
7 concerns with their doctor.  
8  
9  
10

## 11 **Outcomes**

12  
13  
14 The primary outcome is adherence measured by the proportion of days covered (PDC) over  
15 the three months after discharge, using prescription refill data (obtained from the  
16 pharmaceutical benefits scheme (PBS)) for the combination of up to three classes of  
17 medications (antithrombotic, antihypertensive and lipid lowering medications) prescribed.  
18  
19  
20

21  
22 Secondary outcomes include:

- 23  
24 • Adherence measured by the proportion of days covered (PDC) over the twelve  
25 months after discharge, using prescription refill data for up to three classes of  
26 medications (antithrombotic, antihypertensive and lipid lowering medications).  
27  
28
- 29 • Self-reported medication adherence (measured using the Medication Adherence  
30 Questionnaire (MAQ)), organising of ongoing medication supply, and medication  
31 taking behaviour and communication to prescriber in response to perceived  
32 medication related adverse events.  
33  
34
- 35 • Self-reported changes between baseline and 3 and 12 months in perception to their  
36 illness (stroke) using Brief-IPQ and changes between baseline and 3 and 12 months  
37 in beliefs about medications for stroke prevention using BMQ-specific.  
38  
39
- 40 • Clinical outcomes:
  - 41  
42 ○ medication related adverse events (identified by self-report or hospital  
43 readmission),
  - 44  
45 ○ self-report of blood pressure (BP) results,
  - 46  
47 ○ self-report of Cholesterol level,
  - 48  
49 ○ re-admission to hospital with stroke and/or myocardial infarction (MI)  
50 (identified by self-report or hospital records).  
51  
52
- 53  
54 • Changes from baseline to 3 and 12 months in self-reported quality of life using EQ-  
55 5D-5L.<sup>42 43</sup>  
56  
57  
58

- Cost utility analysis using a ratio of incremental cost (cost of the PCEE intervention compared to usual care) to incremental benefit (change in quality-adjusted life years).<sup>44</sup>

The complex relationship between the intervention described here and the measures of the impact we expect to make has been described by authors of previous studies<sup>45 46</sup>. Table 1 has been adapted from Shay and colleagues to categorise the study outcome measures by outcome type and who measures it.

Table 1. The proposed measures categorised by outcome type and who measures it.

|                       | Behavioural outcomes                                      | Affective-cognitive outcomes. (This includes knowledge, understanding, satisfaction)                     | Health outcomes                        | Economic outcomes                      |
|-----------------------|-----------------------------------------------------------|----------------------------------------------------------------------------------------------------------|----------------------------------------|----------------------------------------|
| Patient self-reported | Self report of adherence using MAQ                        | Participant ability to identify each medication of interest along, reason for use when answering the MAQ | Blood Pressure, Cholesterol levels     |                                        |
|                       | Self-report of organising medication supply               | Participant knowing their : blood pressure, cholesterol level                                            | Blood Pressure,Cholesterol levels      |                                        |
|                       | Self report of action if they experienced an ADE          | Participant beliefs and perceptions using the BMQ-specific and brief-IPQ                                 | Self reported quality of life EQ-5D-5L | Self reported quality of life EQ-5D-5L |
|                       |                                                           |                                                                                                          | Self reported ADE                      |                                        |
| Observer collected    | Visit to doctor – Medicare data                           |                                                                                                          | Readmission/admission for ADE          | Readmission/admission for ADE (S)      |
|                       | Prescription refills- Pharmaceutical benefits scheme data |                                                                                                          | Events-Stroke, MI                      | Events-Stroke, MI                      |
|                       |                                                           |                                                                                                          |                                        | Time to conduct intervention           |

Brief-IPQ= brief-Illness Perception Questionnaire<sup>24</sup>, BMQ specific= Beliefs about Medicine questionnaire specific<sup>25</sup>, MAQ= Medication Adherence Questionnaire<sup>26</sup>) EQ-5D-5L= Quality of Life Measure<sup>42</sup> MI= Myocardial Infarction, ADE=Adverse Drug Event

### Behavioural measures

Behavioural measures look at things the participant has done. In this study visiting the doctor and having their medication dispensed is observer collected<sup>47 48</sup>. Pharmaceutical claims data can provide an objective, non-invasive measure of adherence and has been used in many drug trials and in a number of studies similar to this one. A range of methods for use of claims data to measure medication possession ratios and proportion of days covered have been described to assess an individuals' medication adherence<sup>38 47-50</sup>.

1  
2  
3 The Proportion of Days Covered is defined as the days of medication supplies when the  
4 medications were collected divided by the days in the time interval. This can be averaged  
5 over the total (for example a 90 day interval), or to be more reflective of medication  
6 exposure, a shorter interval can be measured and added together (for example in Australia  
7 most medications for chronic diseases are supplied at approximately one month intervals).  
8 The proportion of days covered calculated using multiple short intervals<sup>49 50</sup> can more  
9 accurately account for gaps in supply or extra medication supplies. The example shown in  
10 Figure 1 adapted from Bijlsma<sup>49</sup> and Bryson<sup>50</sup> shows how the adherence over three lots of  
11 30 day intervals can be calculated using the gaps in supply for three patients obtaining 30  
12 day supplies. The calculation used is; Proportion of 90 days covered= (90 –total of days not  
13 covered in each 30 day interval)/90x100.

14  
15  
16  
17  
18  
19  
20  
21  
22 Figure 1. Examples of Proportion of days covered calculated using multiple 30 day intervals.

23  
24  
25 Patient 1 obtained medications on the day of discharge, 30 days later and then had a gap of  
26 five days before the third supply. Patient 1 PDC= [(30 +0) + (30 +0) + (30-5)]/90x100=94%

27  
28  
29 Patient 2 obtained the first supply five days before discharge these were not used until the  
30 day of discharge so although the second supply was obtained 10 days after the first supply  
31 there was only a 5 day gap in supply for the patient. Five days of tablets remaining from the  
32 second supply were used in the third interval. The third supply was obtained after a 10 day  
33 gap. Patient 2 PDC= [(30 +5-5) + (30 -5) + (30+5-10)]/90x100=89%

34  
35  
36 Patient 3 obtained medications on the day of discharge, 20 days later and then had a gap of  
37 40 days before the third supply. Patient 3 PDC= [(30 +0) + (30 +10-10) + (30-  
38 30)]/90x100=67%

39  
40  
41  
42  
43  
44  
45  
46  
47 In this study the days covered in each dispensing interval will be calculated for up to three  
48 different medications (antithrombotic, antihypertensive, lipid lowering medication)  
49 dependant on the medication plan at discharge. These will then be expressed as a mean  
50 (across the up to three medications) percentage and analysed as a continuous variable.

51  
52  
53  
54  
55 Self-reported behavioural measures in this study include self-report of medication  
56 adherence using the MAQ<sup>26</sup>, organising an ongoing medication supply and action taken if

1  
2  
3 they experience adverse effects from their medication. The MAQ is a well validated scale,  
4 previously used in many clinical conditions.<sup>51</sup>  
5

### 6 7 Affective cognitive outcomes

8  
9 Affective cognitive outcomes include measures of what the participant knows and how they  
10 feel, these are usually self-reported.  
11

12  
13 In this study the affective cognitive group includes metrics such as knowledge and  
14 understanding regarding name, type and dose of medications, participants knowing their BP  
15 reading or cholesterol level, participants' perceptions of their illness and beliefs about their  
16 medications. Participant perceptions of their stroke will be evaluated using the adapted-  
17 Brief IPQ at baseline, 3 and 12 months. Beliefs about antithrombotic, antihypertensive and  
18 lipid lowering medications will be evaluated using the BMQ-specific at baseline, 3 months  
19 and 12 months. Changes in these may be able to be used to explain changes in other  
20 measures for example adherence.<sup>46</sup>  
21  
22  
23  
24  
25  
26  
27

### 28 Health Outcomes

29  
30 In this study we will evaluate patient self-reported clinical measures (Blood Pressure (BP)  
31 and Cholesterol) , readmissions, subsequent stroke or myocardial infarction, adverse drug  
32 reactions and quality of life.  
33  
34  
35

36 Medication related adverse events will be identified by patient self-report using probe  
37 questions adapted from a previously validated trigger tool<sup>52</sup> at 3 months and 12 months for  
38 each medication class of interest. Medication related adverse events will also be collected  
39 from any readmission notes at 3 months and 12 months post discharge.  
40  
41  
42  
43

44 Quality of life will be measured using EQ-5D-5L<sup>42</sup> before discharge (baseline), 3 months and  
45 12 months. This tool (EQ-5D-5L) has previously been used in stroke research.<sup>53</sup>  
46  
47  
48  
49  
50

### 51 Economic Outcomes

52  
53 Economic outcomes will be determined from the health service perspective using an  
54 incremental cost effectiveness ratio (ICER). The ICER indicates the difference between the  
55  
56  
57

1  
2  
3 intervention and control cost (time and resources costed) per the difference in quality-  
4 adjusted life years (QALYs) determined using the quality of life measure EQ-5D-5L. Time  
5 taken to deliver the PCEE sessions (intervention group only) will be recorded on the  
6  
7 interview schedule at both the bedside (before discharge) and telephone follow-up (7-10  
8  
9 days post discharge) sessions and costed using standard pharmacist salary rates. Any impact  
10  
11 of the intervention on health-resource use (e.g. medication use, hospital readmissions) will  
12  
13 be considered when estimating costs. Patient interview using EQ-5D-5L will be conducted  
14  
15 before discharge (baseline), at 3 months and 12 months. Uncertainty in the estimated ICER  
16  
17 will be evaluated using non-parametric bootstrapping techniques.

### 18 19 **Data Collection**

20  
21 A schedule of assessments including the timing for data collection is shown in Table 2. Data  
22  
23 will be collected by the investigator prior to the patient's discharge, at least 10 days after  
24  
25 discharge (intervention group only), at 3 months and at 12 months.

26  
27 Demographic data collected prior to the patients discharge includes patient age, sex, stroke  
28  
29 type, whether they have had a previous stroke, whether they live alone, cholesterol levels  
30  
31 and BP on discharge. The demographic data is required to describe the population in the  
32  
33 study and to ensure the intervention and usual care groups are comparable.

34  
35 Participant self-reported data will be obtained by the researcher conducting telephone  
36  
37 follow-up using the telephone numbers they provide during consent. If the participant does  
38  
39 not answer the first call and has provided a mobile telephone number, the researcher will  
40  
41 send a text message using the study mobile phone asking for a "good time to talk." The  
42  
43 protocol allows for a total of three attempts to contact the participant for follow-up calls.  
44  
45  
46  
47  
48  
49  
50  
51  
52  
53  
54  
55  
56  
57  
58

Table 2. Schedule of enrolment, interventions, and assessments for Patient Centered Educational exchange (PCEE) to improve patients' self-management of medications after a stroke.

| <b>TIMEPOINT</b>                                                                                                                                                                                                                                                                                                                                                                                                                                                                                                                                                                                       |                                                                                           | <i>-t1</i>                       | <i>-t2</i><br>Before<br>discharge | <i>t0</i><br>Date of<br>discharge | <i>t1</i><br>approximately<br>10 days post<br>discharge | <i>t2</i><br>approximately<br>3 months post<br>discharge | <i>t3</i><br>approximately<br>12 months post<br>discharge |
|--------------------------------------------------------------------------------------------------------------------------------------------------------------------------------------------------------------------------------------------------------------------------------------------------------------------------------------------------------------------------------------------------------------------------------------------------------------------------------------------------------------------------------------------------------------------------------------------------------|-------------------------------------------------------------------------------------------|----------------------------------|-----------------------------------|-----------------------------------|---------------------------------------------------------|----------------------------------------------------------|-----------------------------------------------------------|
|                                                                                                                                                                                                                                                                                                                                                                                                                                                                                                                                                                                                        |                                                                                           |                                  | Post-allocation                   |                                   |                                                         |                                                          |                                                           |
| <i>Procedure</i>                                                                                                                                                                                                                                                                                                                                                                                                                                                                                                                                                                                       | <i>Detail</i>                                                                             | <i>Baseline</i>                  | <i>Intervention</i>               |                                   | <i>Intervention</i>                                     | <i>Evaluation</i>                                        | <i>Evaluation</i>                                         |
| <b>ENROLMENT:</b>                                                                                                                                                                                                                                                                                                                                                                                                                                                                                                                                                                                      |                                                                                           |                                  |                                   |                                   |                                                         |                                                          |                                                           |
| <i>Eligibility screen</i>                                                                                                                                                                                                                                                                                                                                                                                                                                                                                                                                                                              | <i>MSQ<sup>1,2</sup>=10</i><br><i>Not for</i><br><i>extended</i><br><i>rehabilitation</i> | <i>X</i>                         |                                   |                                   |                                                         |                                                          |                                                           |
| <i>Informed consent</i>                                                                                                                                                                                                                                                                                                                                                                                                                                                                                                                                                                                |                                                                                           | <i>X</i>                         |                                   |                                   |                                                         |                                                          |                                                           |
| <i>Randomisation</i>                                                                                                                                                                                                                                                                                                                                                                                                                                                                                                                                                                                   |                                                                                           | <i>X</i>                         |                                   |                                   |                                                         |                                                          |                                                           |
| <b>INTERVENTION:</b>                                                                                                                                                                                                                                                                                                                                                                                                                                                                                                                                                                                   |                                                                                           |                                  |                                   |                                   |                                                         |                                                          |                                                           |
| <i>First Session</i><br><i>(PCEE)</i>                                                                                                                                                                                                                                                                                                                                                                                                                                                                                                                                                                  | <i>Bedside</i><br><i>Interview</i><br><i>Time taken<sup>3</sup></i>                       |                                  | <i>X</i><br><i>X</i>              |                                   |                                                         |                                                          |                                                           |
| <i>Second Session</i><br><i>(PCEE)</i>                                                                                                                                                                                                                                                                                                                                                                                                                                                                                                                                                                 | <i>10 day follow-</i><br><i>up interview</i><br><i>Time taken<sup>3</sup></i>             |                                  |                                   |                                   | <i>X</i><br><i>X</i>                                    |                                                          |                                                           |
| <b>ASSESSMENTS:</b>                                                                                                                                                                                                                                                                                                                                                                                                                                                                                                                                                                                    |                                                                                           |                                  |                                   |                                   |                                                         |                                                          |                                                           |
| <i>Brief-IPQ,</i><br><i>BMQ-specific,</i><br><i>MAQ</i>                                                                                                                                                                                                                                                                                                                                                                                                                                                                                                                                                |                                                                                           | <i>X</i><br><i>X</i><br><i>X</i> |                                   |                                   | <i>X</i><br><i>X</i><br><i>X</i>                        | <i>X</i><br><i>X</i><br><i>X</i>                         | <i>X</i><br><i>X</i><br><i>X</i>                          |
| <i>EQ-5D-5L</i><br><i>BP, Cholesterol</i>                                                                                                                                                                                                                                                                                                                                                                                                                                                                                                                                                              |                                                                                           | <i>X</i><br><i>X<sup>2</sup></i> |                                   |                                   |                                                         | <i>X</i><br><i>X<sup>4</sup></i>                         | <i>X</i><br><i>X<sup>4</sup></i>                          |
| <i>PBS/MBS data</i><br><i>Admissions,</i><br><i>Stroke, MI</i><br><i>Self-report of ADRs and</i><br><i>Action if ADRs</i>                                                                                                                                                                                                                                                                                                                                                                                                                                                                              |                                                                                           |                                  |                                   |                                   |                                                         | <i>X</i><br><i>X</i><br><i>X</i><br><i>X</i>             | <i>X</i><br><i>X</i><br><i>X</i><br><i>X</i>              |
| <p><i>1.-Mental State Quotient<sup>33</sup>, 2-these are standard care clinical tests performed as part of routine patient care 3-time taken for PCEE, 4</i><br/> <i>-self reported by participants. Brief IPQ= Brief Illness Perception Questionnaire<sup>24</sup>, BMQ specific= Beliefs about medicines</i><br/> <i>Questionnaire<sup>25</sup>, MAQ= Medication Adherence Questionnaire<sup>26</sup>, EQ-5D-5L<sup>42</sup>, PBS/MBS data= Dispensing data obtained from the</i><br/> <i>Australians Pharmaceutical Benefits Scheme, MI= Myocardial Infarction, ADR= Adverse Drug Reactions</i></p> |                                                                                           |                                  |                                   |                                   |                                                         |                                                          |                                                           |

## Data Management

Data will be entered electronically from the case record forms using a study number with no identifying information into Microsoft Excel® and SPSS Statistics 25® both stored on a password protected computer. In all reports from this research, information will be provided in such a way that the participant cannot be identified. Data entry and analyses will be performed using Microsoft Excel® and SPSS Statistics 25®.

## Data Analysis

An intention to treat analysis will be conducted. Results will be reported as numbers and percentages for categorical variables and means (SD) or medians (IQR) for continuous variables. Demographic data and baseline characteristics in the intervention and control groups will be compared using descriptive statistics. Outcomes and changes in outcomes (from baseline) will be compared at 3 months and 12 months.

Adherence measured using the PDC from the prescription refill data will be compared using the Mann-Whitney two-sided test. Changes from baseline in quality of life, perceptions of illness and beliefs about medicines will be analysed using the Mann Whitney test. Adherence by self-report, medication related adverse events and re-admissions will be analysed using the chi-square test.

**Adverse Event Reporting and Quality Assurance:** This study involves completing a questionnaire and discussing stroke medications through one face to face interview and three follow up telephone calls for the intervention group. The control group will complete one face to face interview and two follow-up telephone calls. It is possible that during either the face to face interview or one of the telephone interviews, the participant identifies a medication related issue. Although this is unlikely to be as a result of the study the researcher may still have concerns over the patients' safety. If the researcher has concerns requiring immediate



1  
2  
3 intervention the patients' doctor will be contacted. In the case of the face to face interview in  
4 the hospital that will be a medical member of the treating team. In the case of the telephone  
5 interview that will be the patients' General Practitioner.  
6  
7  
8

9 This is a randomised controlled trial where data on adverse drug reactions and events including  
10 stroke and readmission will be collected. It is possible that differences can be determined  
11 between the two groups before the recruitment period is complete. A data safety monitoring  
12 committee (consisting of an independent medical doctor- clinical pharmacologist and  
13 pharmacist- Drug Use Evaluation Pharmacist) has been established to analyse the adverse  
14 events every 6 months with responsibility to terminate recruitment into the study early if  
15 necessary.  
16  
17  
18  
19  
20  
21  
22

23 This randomised controlled trial will provide evidence about the effect of a patient centred  
24 educational exchange on patient adherence, self-reported medication taking behaviour, clinical  
25 outcomes, quality of life, changes in knowledge, and beliefs towards medicines and illness. It is  
26 expected that communication of results will inform an evidence based approach to  
27 communication with patients about medication taking behaviour related to stroke prevention.  
28 Communication of results of this study will seek to impact on the practice of health  
29 practitioners and consumers interested in patient medicine taking behaviour and those  
30 interested in secondary prevention of stroke.  
31  
32  
33  
34  
35  
36  
37  
38  
39  
40  
41  
42

### 43 **Ethics and Dissemination**

44 This trial has been registered on the Australian New Zealand Clinical Trials Registry, the number  
45 is ACTRN12615000888561. The trial has ethics approval from Metro South Human Research  
46 Ethics Committee (HREC/15/QPAH/531) and The University of Queensland Institutional Human  
47 Research Ethics Approval Number 2015001612.  
48  
49  
50  
51

52 Participants will be provided with information about the study and asked if they consent to the  
53 study; "Participant information and consent form" (see online supplementary file 3. Patient  
54  
55  
56  
57

1  
2  
3 Information and Consent Form). To obtain consent for medication refill data from the  
4 Pharmaceutical Benefits Scheme and occasions of service by visits to doctor data from  
5 Medicare, the patients will be given an extra consent form as required by the Department of  
6 Human Services. This is also contained in the "Participant information and consent form". The  
7 patient can choose not to supply the extra consent for access to Pharmaceutical Benefits  
8 Scheme/Medicare data. The participant is free to withdraw from the study at any time.  
9  
10  
11  
12  
13  
14

15 **Acknowledgements:** The authors would like to acknowledge the feedback and advice provided  
16 by participants of the feasibility study conducted to inform this protocol. The authors would like  
17 to acknowledge the encouragement and feedback from the Medical and Nursing Staff of the  
18 Stroke Unit at Princess Alexandra Hospital during the development of this protocol.  
19  
20

21 **Contributors:** JC, NC, DR and JW were all equally involved in the development of this protocol.  
22 DR provided advice on academic detailing. JW provided advice on Quality of Life measurement  
23 and economic analysis. JC and NC wrote the initial drafts of this paper. All authors have been  
24 involved in the reviewing and editing, and approval of the final protocol manuscript.  
25  
26

27 **Competing interests:** None declared  
28  
29

30 **Funding:** The Research Strategies Funding, School of Pharmacy, University of Queensland has  
31 provided funding for the first 3 month Pharmaceutical Benefits Scheme/Medicare claims data  
32 for the first 60 participants. Further funding is being sought to pay for the remaining claims  
33 data.  
34  
35  
36  
37  
38

39 **Data sharing:** The data from this study is not available for data sharing.  
40  
41  
42  
43

## 44 **References:**

45  
46  
47  
48

- 49 1. Australian Bureau of Statistics. Australia's leading causes of death, 2016 2016 [updated  
50 27/09/2017. Available from:  
51 [http://www.abs.gov.au/ausstats/abs@.nsf/Lookup/by%20Subject/3303.0~2016~Main%](http://www.abs.gov.au/ausstats/abs@.nsf/Lookup/by%20Subject/3303.0~2016~Main%20Features~Australia's%20leading%20causes%20of%20death,%202016~3)  
52 [20Features~Australia's%20leading%20causes%20of%20death,%202016~3](http://www.abs.gov.au/ausstats/abs@.nsf/Lookup/by%20Subject/3303.0~2016~Main%20Features~Australia's%20leading%20causes%20of%20death,%202016~3) accessed  
53 08/07/2018 2018.  
54  
55  
56  
57

- 1  
2  
3 2. Hankey GJ. The global and regional burden of stroke. *The Lancet Global Health*  
4 2013;1(5):e239-e40. doi: 10.1016/s2214-109x(13)70095-0  
5  
6
- 7 3. Feigin VL, Forouzanfar MH, Krishnamurthi R, et al. Global and regional burden of stroke  
8 during 1990–2010: findings from the Global Burden of Disease Study 2010. *The Lancet*  
9 2014;383(9913):245-55. doi: 10.1016/s0140-6736(13)61953-4  
10  
11
- 12 4. Australian Institute of Health and Welfare. Australia's Health 2016. Australia's health series.  
13 Canberra: AIHW, 2016.  
14  
15
- 16 5. Hardie K, Hankey GJ, Jamrozik K, et al. Ten-year risk of first recurrent stroke and disability  
17 after first-ever stroke in the Perth Community Stroke Study. *Stroke* 2004;35(3):731-35.  
18 doi: Doi 10.1161/01.Str.0000116183.50167.D9  
19  
20
- 21 6. Burn J, Dennis M, Bamford J, et al. Long-term risk of recurrent stroke after a first-ever stroke.  
22 The Oxfordshire Community Stroke Project. *Stroke* 1994;25(2):333-7. [published Online  
23 First: 1994/02/01]  
24  
25
- 26 7. Hankey GJ. Long-Term Outcome after Ischaemic Stroke/Transient Ischaemic Attack.  
27 *Cerebrovascular Diseases* 2003;16(Suppl. 1):14-19.  
28  
29
- 30 8. Goldstein LB, Bertels C, Davis JN. Interrater reliability of the NIH stroke scale. *Arch Neurol*  
31 1989;46(6):660-2.  
32  
33
- 34 9. Coull AJ, Lovett JK, Rothwell PM, et al. Population based study of early risk of stroke after  
35 transient ischaemic attack or minor stroke: implications for public education and  
36 organisation of services. *Brit Med J* 2004;328(7435):326-28. doi:  
37 10.1136/bmj.37991.635266.44  
38  
39
- 40 10. Powers WJ, Rabinstein AA, Ackerson T, et al. 2018 Guidelines for the Early Management of  
41 Patients With Acute Ischemic Stroke: A Guideline for Healthcare Professionals From the  
42 American Heart Association/American Stroke Association. *Stroke* 2018;49(3):E46-E110.  
43 doi: 10.1161/Str.000000000000158  
44  
45
- 46 11. Intercollegiate Stroke Working Party. National Clinical Guideline for Stroke. 5th Edition ed.  
47 London: Royal College of Physicians 2016.  
48  
49
- 50 12. Scottish Intercollegiate Guidelines Network. Management of patients with stroke or  
51 TIA:assessment, investigation, immediate management and secondary prevention. In:  
52 Scottish Intercollegiate Guidelines Network, ed. Edinburgh: Scottish Intercollegiate  
53 Guidelines Network, Elliott House, 8 -10 Hillside Crescent, 2008.  
54  
55  
56  
57

- 1  
2  
3 13. Stroke Foundation. Clinical Guidelines for Stroke Management 2017. Melbourne Australia.:  
4 Stroke Foundation 2017.  
5  
6
- 7 14. Kronish IM, Diefenbach MA, Edmondson DE, et al. Key Barriers to Medication Adherence in  
8 Survivors of Strokes and Transient Ischemic Attacks. *Journal of general internal medicine*  
9 2013 doi: 10.1007/s11606-012-2308-x [published Online First: 2013/01/05]  
10  
11
- 12 15. Bushnell CD, Olson DM, Zhao X, et al. Secondary preventive medication persistence and  
13 adherence 1 year after stroke. *Neurology* 2011;77(12):1182-90. doi:  
14 10.1212/WNL.0b013e31822f0423 [published Online First: 2011/09/09]  
15  
16
- 17 16. Glader EL, Sjolander M, Eriksson M, et al. Persistent Use of Secondary Preventive Drugs  
18 Declines Rapidly During the First 2 Years After Stroke. *Stroke* 2010;41(2):397-401. doi:  
19 Doi 10.1161/Strokeaha.109.566950  
20  
21
- 22 17. Runciman WB, Roughead EE, Semple SJ, et al. Adverse drug events and medication errors in  
23 Australia. *International Journal for Quality in Health Care* 2003;15(Supplement 1):i49–  
24 i59.  
25  
26
- 27 18. Jiang Y, Yang X, Li Z, et al. Persistence of secondary prevention medication and related  
28 factors for acute ischemic stroke and transient ischemic attack in China. *Neurological*  
29 *research* 2017;39(6):492-97. doi: 10.1080/01616412.2017.1312792 [published Online  
30 First: 2017/04/20]  
31  
32
- 33 19. Jamison J, Sutton S, Mant J, et al. Barriers and facilitators to adherence to secondary stroke  
34 prevention medications after stroke: analysis of survivors and caregivers views from an  
35 online stroke forum. *BMJ Open* 2017;7(7):e016814. doi: 10.1136/bmjopen-2017-016814  
36  
37
- 38 20. Ellis G, Rodger J, McAlpine C, et al. The impact of stroke nurse specialist input on risk factor  
39 modification: a randomised controlled trial. *Age and Ageing* 2005;34(4):389-92. doi: DOI  
40 10.1093/ageing/afi075  
41  
42
- 43 21. McManus JA, Craig A, McAlpine C, et al. Does behaviour modification affect post-stroke risk  
44 factor control? Three-year follow-up of a randomized controlled trial. *Clinical*  
45 *rehabilitation* 2009;23(2):99-105. doi: 10.1177/0269215508095874 [published Online  
46 First: 2009/01/09]  
47  
48
- 49 22. Adie K, James MA. Does telephone follow-up improve blood pressure after minor stroke or  
50 TIA? *Age Ageing* 2010;39(5):598-603. doi: 10.1093/ageing/afq085 [published Online  
51 First: 2010/07/30]  
52  
53  
54  
55  
56  
57

- 1  
2  
3 23. O'Carroll RE, Chambers JA, Dennis M, et al. Improving adherence to medication in stroke  
4 survivors: a pilot randomised controlled trial. *Annals of behavioral medicine : a*  
5 *publication of the Society of Behavioral Medicine* 2013;46(3):358-68. doi:  
6 10.1007/s12160-013-9515-5 [published Online First: 2013/05/15]  
7  
8  
9  
10 24. Broadbent E, Petrie KJ, Main J, et al. The brief illness perception questionnaire. *J Psychosom*  
11 *Res* 2006;60(6):631-7. doi: 10.1016/j.jpsychores.2005.10.020 [published Online First:  
12 2006/05/30]  
13  
14  
15 25. Horne R, Weinman J, Hankins M. The beliefs about medicines questionnaire: the  
16 development and evaluation of a new method for assessing the cognitive  
17 representation of medication. *Psychology and Health* 1999;14(1):1-24.  
18  
19  
20 26. Morisky DE, Green LW, Levine DM. Concurrent and predictive validity of a self-reported  
21 measure of medication adherence. *Medical Care* 1986;24(1):67-74.  
22  
23  
24 27. Nguyen TMU, La Caze A, Cottrell N. Validated adherence scales used in a measurement-  
25 guided medication management approach to target and tailor a medication adherence  
26 intervention: a randomised controlled trial. *BMJ Open* 2016;6(11)  
27  
28  
29 28. Soumerai SB, Avorn J. Principles of educational outreach ('academic detailing') to improve  
30 clinical decision making. *JAMA* 1990;263(4):549-56. [published Online First: 1990/01/26]  
31  
32  
33 29. O'Brien Mary A, Rogers S, Jamtvedt G, et al. Educational outreach visits: effects on  
34 professional practice and health care outcomes. *Cochrane Db Syst Rev* 2007; (4).  
35 <http://onlinelibrary.wiley.com/doi/10.1002/14651858.CD000409.pub2/abstract>  
36  
37 [http://onlinelibrary.wiley.com/store/10.1002/14651858.CD000409.pub2/asset/CD000409.pdf?](http://onlinelibrary.wiley.com/store/10.1002/14651858.CD000409.pub2/asset/CD000409.pdf?v=1&t=hh9xh6bh&s=09db68c95091bda34e3b4e28ad775312ec107ff5)  
38 [v=1&t=hh9xh6bh&s=09db68c95091bda34e3b4e28ad775312ec107ff5.](http://onlinelibrary.wiley.com/store/10.1002/14651858.CD000409.pub2/asset/CD000409.pdf?v=1&t=hh9xh6bh&s=09db68c95091bda34e3b4e28ad775312ec107ff5)  
39  
40  
41 30. West CM, Dodd MJ, Paul SM, et al. The PRO-SELF(c): Pain Control Program--an effective  
42 approach for cancer pain management. *Oncology nursing forum* 2003;30(1):65-73. doi:  
43 10.1188/03.onf.65-73 [published Online First: 2003/01/08]  
44  
45  
46 31. Abernethy AP, Currow DC, Shelby-James T, et al. Delivery Strategies to Optimize Resource  
47 Utilization and Performance Status for Patients With Advanced Life-Limiting Illness:  
48 Results From the "Palliative Care Trial" [ISRCTN81117481]. *Journal of Pain and Symptom*  
49 *Management* 2012;45(3):488-505.  
50  
51  
52  
53 32. Coombes J, Rowett D, Whitty J, et al. A Conversation About Stroke Medications: Using  
54 Patient Perceptions to Personalise Educational Messages. *Cerebrovasc Dis* 2016;42  
55 Suppl 1:100. doi: 10.1159/000447732  
56  
57

- 1  
2  
3 33. Pfeiffer E. A short portable mental status questionnaire for the assessment of organic brain  
4 deficit in elderly patients. *J Am Geriatr Soc* 1975;23(10):433-41. [published Online First:  
5 1975/10/01]  
6  
7  
8 34. SealedenvelopeLTD. sealed envelope London: Clerkenwell Workshops; 2015 [accessed  
9 Accessed 17 Jul 2015 2015].  
10  
11  
12 35. Nguyen VHV, Poon J, Tokuda L, et al. Pharmacist telephone interventions improve  
13 adherence to stroke preventive medications and reduce stroke risk factors: A  
14 randomized controlled trial. *Stroke* 2011;42(3):e244.  
15  
16  
17 36. Ho PM, Lambert-Kerzner A, Carey EP, et al. Multifaceted intervention to improve  
18 medication adherence and secondary prevention measures after acute coronary  
19 syndrome hospital discharge: a randomized clinical trial. *JAMA internal medicine*  
20 2014;174(2):186-93. doi: 10.1001/jamainternmed.2013.12944 [published Online First:  
21 2013/11/20]  
22  
23  
24  
25 37. Bailey JE, Wan JY, Tang J, et al. Antihypertensive medication adherence, ambulatory visits,  
26 and risk of stroke and death. *J Gen Intern Med* 2010;25(6):495-503. doi:  
27 10.1007/s11606-009-1240-1 [published Online First: 2010/02/19]  
28  
29  
30 38. Hedegaard U, Kjeldsen LJ, Pottegard A, et al. Multifaceted intervention including  
31 motivational interviewing to support medication adherence after stroke/transient  
32 ischemic attack: a randomized trial. *Cerebrovascular diseases extra* 2014;4(3):221-34.  
33 doi: 10.1159/000369380 [published Online First: 2015/01/20]  
34  
35  
36  
37 39. Lehmann EL, D'Abrera HJM. Nonparametrics : statistical methods based on ranks / E. L.  
38 Lehmann, with the special assistance of H. J. M. D'Abrera. San Fransisco1998:76-81.  
39  
40  
41 40. Stroke Foundation. My Stroke Journey Melbourne: Stroke Foundation; 2017 [cited 2018  
42 3/1/18]. Available from: [https://strokefoundation.org.au/about-stroke/help-after-](https://strokefoundation.org.au/about-stroke/help-after-stroke/stroke-resources-and-fact-sheets2018)  
43 [stroke/stroke-resources-and-fact-sheets2018](https://strokefoundation.org.au/about-stroke/help-after-stroke/stroke-resources-and-fact-sheets2018).  
44  
45  
46 41. Lum E, Muscillo N, McLeod S, et al. Medication Reconciliation—the Queensland Health  
47 Experience. *Journal of Pharmacy Practice and Research* 2007;37(1):7-10. doi:  
48 10.1002/j.2055-2335.2007.tb00647.x  
49  
50  
51 42. Euroqol Research Foundation. EQ-5D-5L User Guide 2015 [cited 2018 27/1/18]. User Guide].  
52 Available from: [https://euroqol.org/wp-content/uploads/2016/09/EQ-5D-](https://euroqol.org/wp-content/uploads/2016/09/EQ-5D-5L_UserGuide_2015.pdf)  
53 [5L\\_UserGuide\\_2015.pdf](https://euroqol.org/wp-content/uploads/2016/09/EQ-5D-5L_UserGuide_2015.pdf) accessed 27/1/18 2018.  
54  
55  
56  
57  
58

- 1  
2  
3  
4  
5  
6  
7  
8  
9  
10  
11  
12  
13  
14  
15  
16  
17  
18  
19  
20  
21  
22  
23  
24  
25  
26  
27  
28  
29  
30  
31  
32  
33  
34  
35  
36  
37  
38  
39  
40  
41  
42  
43  
44  
45  
46  
47  
48  
49  
50  
51  
52  
53  
54  
55  
56  
57  
58  
59  
60
43. Herdman M, Gudex C, Lloyd A, et al. Development and preliminary testing of the new five-level version of EQ-5D (EQ-5D-5L). *Quality of Life Research* 2011;20(10):1727-36. doi: 10.1007/s11136-011-9903-x
44. Norman R, Cronin P, Viney R. A Pilot Discrete Choice Experiment to Explore Preferences for EQ-5D-5L Health States. *Applied Health Economics and Health Policy* 2013;11(3):287-98. doi: 10.1007/s40258-013-0035-z
45. Shay LA, Lafata JE. Where Is the Evidence? A Systematic Review of Shared Decision Making and Patient Outcomes. *Med Decis Making* 2014 doi: 10.1177/0272989X14551638
46. O'Carroll RE, Chambers JA, Dennis M, et al. Improving medication adherence in stroke survivors: mediators and moderators of treatment effects. *Health Psychol* 2014;33(10):1241-50. doi: 10.1037/hea0000082 [published Online First: 2014/07/16]
47. Lehmann A, Aslani P, Ahmed R, et al. Assessing medication adherence: options to consider. *International journal of clinical pharmacy* 2014;36(1):55-69. doi: 10.1007/s11096-013-9865-x [published Online First: 2013/10/30]
48. Steiner JF, Prochazka AV. The assessment of refill compliance using pharmacy records: methods, validity, and applications. *J Clin Epidemiol* 1997;50(1):105-16. [published Online First: 1997/01/01]
49. Bijlsma MJ, Janssen F, Hak E. Estimating time-varying drug adherence using electronic records: extending the proportion of days covered (PDC) method. *Pharmacoepidem Dr S* 2016;25(3):325-32. doi: 10.1002/pds.3935
50. Bryson CL, Au DH, Young B, et al. A refill adherence algorithm for multiple short intervals to estimate refill compliance (ReComp). *Medical Care* 2007;45(6):497-504. doi: DOI 10.1097/MLR.0b013e3180329368
51. Nguyen TM, Caze AL, Cottrell N. What are validated self-report adherence scales really measuring?: a systematic review. *Br J Clin Pharmacol* 2014;77(3):427-45. doi: 10.1111/bcp.12194 [published Online First: 2013/06/28]
52. Rozich JD, Haraden CR, Resar RK. Adverse drug event trigger tool: a practical methodology for measuring medication related harm. *Qual Saf Health Care* 2003;12(3):194-200. [published Online First: 2003/06/07]
53. Golicki D, Niewada M, Karlińska A, et al. Comparing responsiveness of the EQ-5D-5L, EQ-5D-3L and EQ VAS in stroke patients. *Quality of Life Research* 2015;24(6):1555-63. doi: 10.1007/s11136-014-0873-7

## Figures

Figure 1. Examples of Proportion of days covered calculated using multiple 30 day intervals.

## Supplementary Files

1. SPIRIT checklist
2. Infographic example
3. Participant Information and Consent Form

For peer review only





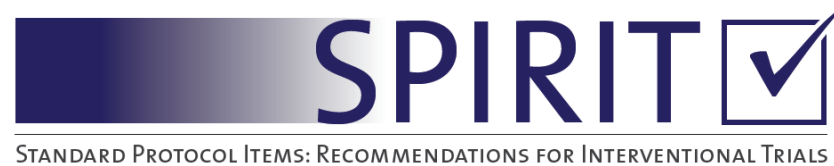

SPIRIT 2013 Checklist: Recommended items to address in a clinical trial protocol and related documents\*

| Section/item                      | Item No | Description                                                                                                                                                                                                                                                                              | Addressed on page number |
|-----------------------------------|---------|------------------------------------------------------------------------------------------------------------------------------------------------------------------------------------------------------------------------------------------------------------------------------------------|--------------------------|
| <b>Administrative information</b> |         |                                                                                                                                                                                                                                                                                          |                          |
| Title                             | 1       | Descriptive title identifying the study design, population, interventions, and, if applicable, trial acronym                                                                                                                                                                             | 1                        |
| Trial registration                | 2a      | Trial identifier and registry name. If not yet registered, name of intended registry                                                                                                                                                                                                     | 1                        |
|                                   | 2b      | All items from the World Health Organization Trial Registration Data Set                                                                                                                                                                                                                 | 1 (20 items in ANZCTR)   |
| Protocol version                  | 3       | Date and version identifier                                                                                                                                                                                                                                                              | Y                        |
| Funding                           | 4       | Sources and types of financial, material, and other support                                                                                                                                                                                                                              | 20                       |
| Roles and responsibilities        | 5a      | Names, affiliations, and roles of protocol contributors                                                                                                                                                                                                                                  | 1                        |
|                                   | 5b      | Name and contact information for the trial sponsor                                                                                                                                                                                                                                       | N/A                      |
|                                   | 5c      | Role of study sponsor and funders, if any, in study design; collection, management, analysis, and interpretation of data; writing of the report; and the decision to submit the report for publication, including whether they will have ultimate authority over any of these activities | N/A                      |
|                                   | 5d      | Composition, roles, and responsibilities of the coordinating centre, steering committee, endpoint adjudication committee, data management team, and other individuals or groups overseeing the trial, if applicable (see Item 21a for data monitoring committee)                         | N/A                      |

|    |                                                           |     |                                                                                                               |           |
|----|-----------------------------------------------------------|-----|---------------------------------------------------------------------------------------------------------------|-----------|
| 1  | <b>Introduction</b>                                       |     |                                                                                                               |           |
| 2  |                                                           |     |                                                                                                               |           |
| 3  | Background and                                            | 6a  | Description of research question and justification for undertaking the trial, including summary of relevant   | 5-7       |
| 4  | rationale                                                 |     | studies (published and unpublished) examining benefits and harms for each intervention                        |           |
| 5  |                                                           |     |                                                                                                               |           |
| 6  |                                                           | 6b  | Explanation for choice of comparators                                                                         | 5-7       |
| 7  |                                                           |     |                                                                                                               |           |
| 8  | Objectives                                                | 7   | Specific objectives or hypotheses                                                                             | 7         |
| 9  |                                                           |     |                                                                                                               |           |
| 10 | Trial design                                              | 8   | Description of trial design including type of trial (eg, parallel group, crossover, factorial, single group), |           |
| 11 |                                                           |     | allocation ratio, and framework (eg, superiority, equivalence, noninferiority, exploratory)                   | 7-8       |
| 12 |                                                           |     |                                                                                                               |           |
| 13 |                                                           |     |                                                                                                               |           |
| 14 | <b>Methods: Participants, interventions, and outcomes</b> |     |                                                                                                               |           |
| 15 |                                                           |     |                                                                                                               |           |
| 16 | Study setting                                             | 9   | Description of study settings (eg, community clinic, academic hospital) and list of countries where data will | 7-8       |
| 17 |                                                           |     | be collected. Reference to where list of study sites can be obtained                                          |           |
| 18 |                                                           |     |                                                                                                               |           |
| 19 | Eligibility criteria                                      | 10  | Inclusion and exclusion criteria for participants. If applicable, eligibility criteria for study centres and  | 7-8       |
| 20 |                                                           |     | individuals who will perform the interventions (eg, surgeons, psychotherapists)                               |           |
| 21 |                                                           |     |                                                                                                               |           |
| 22 | Interventions                                             | 11a | Interventions for each group with sufficient detail to allow replication, including how and when they will be | 10-11     |
| 23 |                                                           |     | administered                                                                                                  |           |
| 24 |                                                           |     |                                                                                                               |           |
| 25 |                                                           | 11b | Criteria for discontinuing or modifying allocated interventions for a given trial participant (eg, drug dose  | N/A       |
| 26 |                                                           |     | change in response to harms, participant request, or improving/worsening disease)                             |           |
| 27 |                                                           |     |                                                                                                               |           |
| 28 |                                                           | 11c | Strategies to improve adherence to intervention protocols, and any procedures for monitoring adherence        | N/A       |
| 29 |                                                           |     | (eg, drug tablet return, laboratory tests)                                                                    |           |
| 30 |                                                           |     |                                                                                                               |           |
| 31 |                                                           | 11d | Relevant concomitant care and interventions that are permitted or prohibited during the trial                 | 10        |
| 32 |                                                           |     |                                                                                                               |           |
| 33 | Outcomes                                                  | 12  | Primary, secondary, and other outcomes, including the specific measurement variable (eg, systolic blood       |           |
| 34 |                                                           |     | pressure), analysis metric (eg, change from baseline, final value, time to event), method of aggregation (eg, | 11-17     |
| 35 |                                                           |     | median, proportion), and time point for each outcome. Explanation of the clinical relevance of chosen         |           |
| 36 |                                                           |     | efficacy and harm outcomes is strongly recommended                                                            |           |
| 37 |                                                           |     |                                                                                                               |           |
| 38 | Participant timeline                                      | 13  | Time schedule of enrolment, interventions (including any run-ins and washouts), assessments, and visits for   | 17        |
| 39 |                                                           |     | participants. A schematic diagram is highly recommended (see Figure)                                          | (Table 2) |
| 40 |                                                           |     |                                                                                                               |           |
| 41 |                                                           |     |                                                                                                               |           |
| 42 |                                                           |     |                                                                                                               |           |
| 43 |                                                           |     |                                                                                                               |           |
| 44 |                                                           |     |                                                                                                               |           |
| 45 |                                                           |     |                                                                                                               |           |
| 46 |                                                           |     |                                                                                                               |           |

|   |             |    |                                                                                                                                                                                       |      |
|---|-------------|----|---------------------------------------------------------------------------------------------------------------------------------------------------------------------------------------|------|
| 1 | Sample size | 14 | Estimated number of participants needed to achieve study objectives and how it was determined, including clinical and statistical assumptions supporting any sample size calculations | 9-10 |
| 2 |             |    |                                                                                                                                                                                       |      |
| 3 |             |    |                                                                                                                                                                                       |      |
| 4 | Recruitment | 15 | Strategies for achieving adequate participant enrolment to reach target sample size                                                                                                   | 9    |
| 5 |             |    |                                                                                                                                                                                       |      |

### 6 **Methods: Assignment of interventions (for controlled trials)**

#### 7 Allocation:

|    |                                  |     |                                                                                                                                                                                                                                                                                                                                                          |     |
|----|----------------------------------|-----|----------------------------------------------------------------------------------------------------------------------------------------------------------------------------------------------------------------------------------------------------------------------------------------------------------------------------------------------------------|-----|
| 8  |                                  |     |                                                                                                                                                                                                                                                                                                                                                          |     |
| 9  |                                  |     |                                                                                                                                                                                                                                                                                                                                                          |     |
| 10 | Sequence generation              | 16a | Method of generating the allocation sequence (eg, computer-generated random numbers), and list of any factors for stratification. To reduce predictability of a random sequence, details of any planned restriction (eg, blocking) should be provided in a separate document that is unavailable to those who enrol participants or assign interventions | 9   |
| 11 |                                  |     |                                                                                                                                                                                                                                                                                                                                                          |     |
| 12 |                                  |     |                                                                                                                                                                                                                                                                                                                                                          |     |
| 13 |                                  |     |                                                                                                                                                                                                                                                                                                                                                          |     |
| 14 |                                  |     |                                                                                                                                                                                                                                                                                                                                                          |     |
| 15 |                                  |     |                                                                                                                                                                                                                                                                                                                                                          |     |
| 16 | Allocation concealment mechanism | 16b | Mechanism of implementing the allocation sequence (eg, central telephone; sequentially numbered, opaque, sealed envelopes), describing any steps to conceal the sequence until interventions are assigned                                                                                                                                                | 9   |
| 17 |                                  |     |                                                                                                                                                                                                                                                                                                                                                          |     |
| 18 |                                  |     |                                                                                                                                                                                                                                                                                                                                                          |     |
| 19 |                                  |     |                                                                                                                                                                                                                                                                                                                                                          |     |
| 20 | Implementation                   | 16c | Who will generate the allocation sequence, who will enrol participants, and who will assign participants to interventions                                                                                                                                                                                                                                | 9   |
| 21 |                                  |     |                                                                                                                                                                                                                                                                                                                                                          |     |
| 22 |                                  |     |                                                                                                                                                                                                                                                                                                                                                          |     |
| 23 |                                  |     |                                                                                                                                                                                                                                                                                                                                                          |     |
| 24 | Blinding (masking)               | 17a | Who will be blinded after assignment to interventions (eg, trial participants, care providers, outcome assessors, data analysts), and how                                                                                                                                                                                                                | 9   |
| 25 |                                  |     |                                                                                                                                                                                                                                                                                                                                                          |     |
| 26 |                                  |     |                                                                                                                                                                                                                                                                                                                                                          |     |
| 27 |                                  | 17b | If blinded, circumstances under which unblinding is permissible, and procedure for revealing a participant's allocated intervention during the trial                                                                                                                                                                                                     | N/A |
| 28 |                                  |     |                                                                                                                                                                                                                                                                                                                                                          |     |
| 29 |                                  |     |                                                                                                                                                                                                                                                                                                                                                          |     |
| 30 |                                  |     |                                                                                                                                                                                                                                                                                                                                                          |     |

### 31 **Methods: Data collection, management, and analysis**

|    |                         |     |                                                                                                                                                                                                                                                                                                                                                                                                              |       |
|----|-------------------------|-----|--------------------------------------------------------------------------------------------------------------------------------------------------------------------------------------------------------------------------------------------------------------------------------------------------------------------------------------------------------------------------------------------------------------|-------|
| 32 |                         |     |                                                                                                                                                                                                                                                                                                                                                                                                              |       |
| 33 | Data collection methods | 18a | Plans for assessment and collection of outcome, baseline, and other trial data, including any related processes to promote data quality (eg, duplicate measurements, training of assessors) and a description of study instruments (eg, questionnaires, laboratory tests) along with their reliability and validity, if known. Reference to where data collection forms can be found, if not in the protocol | 12-17 |
| 34 |                         |     |                                                                                                                                                                                                                                                                                                                                                                                                              |       |
| 35 |                         |     |                                                                                                                                                                                                                                                                                                                                                                                                              |       |
| 36 |                         |     |                                                                                                                                                                                                                                                                                                                                                                                                              |       |
| 37 |                         |     |                                                                                                                                                                                                                                                                                                                                                                                                              |       |
| 38 |                         |     |                                                                                                                                                                                                                                                                                                                                                                                                              |       |
| 39 |                         | 18b | Plans to promote participant retention and complete follow-up, including list of any outcome data to be collected for participants who discontinue or deviate from intervention protocols                                                                                                                                                                                                                    | 16    |
| 40 |                         |     |                                                                                                                                                                                                                                                                                                                                                                                                              |       |
| 41 |                         |     |                                                                                                                                                                                                                                                                                                                                                                                                              |       |
| 42 |                         |     |                                                                                                                                                                                                                                                                                                                                                                                                              |       |

|    |                                 |     |                                                                                                                                                                                                                                                                                                                                       |       |
|----|---------------------------------|-----|---------------------------------------------------------------------------------------------------------------------------------------------------------------------------------------------------------------------------------------------------------------------------------------------------------------------------------------|-------|
| 1  | Data management                 | 19  | Plans for data entry, coding, security, and storage, including any related processes to promote data quality (eg, double data entry; range checks for data values). Reference to where details of data management procedures can be found, if not in the protocol                                                                     | 18-19 |
| 2  |                                 |     |                                                                                                                                                                                                                                                                                                                                       |       |
| 3  |                                 |     |                                                                                                                                                                                                                                                                                                                                       |       |
| 4  |                                 |     |                                                                                                                                                                                                                                                                                                                                       |       |
| 5  | Statistical methods             | 20a | Statistical methods for analysing primary and secondary outcomes. Reference to where other details of the statistical analysis plan can be found, if not in the protocol                                                                                                                                                              | 18-19 |
| 6  |                                 |     |                                                                                                                                                                                                                                                                                                                                       |       |
| 7  |                                 |     |                                                                                                                                                                                                                                                                                                                                       |       |
| 8  |                                 | 20b | Methods for any additional analyses (eg, subgroup and adjusted analyses)                                                                                                                                                                                                                                                              | N/A   |
| 9  |                                 |     |                                                                                                                                                                                                                                                                                                                                       |       |
| 10 |                                 | 20c | Definition of analysis population relating to protocol non-adherence (eg, as randomised analysis), and any statistical methods to handle missing data (eg, multiple imputation)                                                                                                                                                       | 18    |
| 11 |                                 |     |                                                                                                                                                                                                                                                                                                                                       |       |
| 12 |                                 |     |                                                                                                                                                                                                                                                                                                                                       |       |
| 13 |                                 |     |                                                                                                                                                                                                                                                                                                                                       |       |
| 14 | <b>Methods: Monitoring</b>      |     |                                                                                                                                                                                                                                                                                                                                       |       |
| 15 |                                 |     |                                                                                                                                                                                                                                                                                                                                       |       |
| 16 | Data monitoring                 | 21a | Composition of data monitoring committee (DMC); summary of its role and reporting structure; statement of whether it is independent from the sponsor and competing interests; and reference to where further details about its charter can be found, if not in the protocol. Alternatively, an explanation of why a DMC is not needed | 19    |
| 17 |                                 |     |                                                                                                                                                                                                                                                                                                                                       |       |
| 18 |                                 |     |                                                                                                                                                                                                                                                                                                                                       |       |
| 19 |                                 |     |                                                                                                                                                                                                                                                                                                                                       |       |
| 20 |                                 |     |                                                                                                                                                                                                                                                                                                                                       |       |
| 21 |                                 |     |                                                                                                                                                                                                                                                                                                                                       |       |
| 22 |                                 | 21b | Description of any interim analyses and stopping guidelines, including who will have access to these interim results and make the final decision to terminate the trial                                                                                                                                                               | 19    |
| 23 |                                 |     |                                                                                                                                                                                                                                                                                                                                       |       |
| 24 |                                 |     |                                                                                                                                                                                                                                                                                                                                       |       |
| 25 | Harms                           | 22  | Plans for collecting, assessing, reporting, and managing solicited and spontaneously reported adverse events and other unintended effects of trial interventions or trial conduct                                                                                                                                                     | 19    |
| 26 |                                 |     |                                                                                                                                                                                                                                                                                                                                       |       |
| 27 |                                 |     |                                                                                                                                                                                                                                                                                                                                       |       |
| 28 | Auditing                        | 23  | Frequency and procedures for auditing trial conduct, if any, and whether the process will be independent from investigators and the sponsor                                                                                                                                                                                           | N/A   |
| 29 |                                 |     |                                                                                                                                                                                                                                                                                                                                       |       |
| 30 |                                 |     |                                                                                                                                                                                                                                                                                                                                       |       |
| 31 |                                 |     |                                                                                                                                                                                                                                                                                                                                       |       |
| 32 | <b>Ethics and dissemination</b> |     |                                                                                                                                                                                                                                                                                                                                       |       |
| 33 |                                 |     |                                                                                                                                                                                                                                                                                                                                       |       |
| 34 | Research ethics approval        | 24  | Plans for seeking research ethics committee/institutional review board (REC/IRB) approval                                                                                                                                                                                                                                             | 19    |
| 35 |                                 |     |                                                                                                                                                                                                                                                                                                                                       |       |
| 36 |                                 |     |                                                                                                                                                                                                                                                                                                                                       |       |
| 37 | Protocol amendments             | 25  | Plans for communicating important protocol modifications (eg, changes to eligibility criteria, outcomes, analyses) to relevant parties (eg, investigators, REC/IRBs, trial participants, trial registries, journals, regulators)                                                                                                      | N/A   |
| 38 |                                 |     |                                                                                                                                                                                                                                                                                                                                       |       |
| 39 |                                 |     |                                                                                                                                                                                                                                                                                                                                       |       |
| 40 |                                 |     |                                                                                                                                                                                                                                                                                                                                       |       |
| 41 |                                 |     |                                                                                                                                                                                                                                                                                                                                       |       |
| 42 |                                 |     |                                                                                                                                                                                                                                                                                                                                       |       |
| 43 |                                 |     |                                                                                                                                                                                                                                                                                                                                       |       |
| 44 |                                 |     |                                                                                                                                                                                                                                                                                                                                       |       |
| 45 |                                 |     |                                                                                                                                                                                                                                                                                                                                       |       |
| 46 |                                 |     |                                                                                                                                                                                                                                                                                                                                       |       |

|    |                               |     |                                                                                                                                                                                                                                                                                     |           |
|----|-------------------------------|-----|-------------------------------------------------------------------------------------------------------------------------------------------------------------------------------------------------------------------------------------------------------------------------------------|-----------|
| 1  | Consent or assent             | 26a | Who will obtain informed consent or assent from potential trial participants or authorised surrogates, and how (see Item 32)                                                                                                                                                        | 8         |
| 2  |                               |     |                                                                                                                                                                                                                                                                                     |           |
| 3  |                               |     |                                                                                                                                                                                                                                                                                     |           |
| 4  |                               | 26b | Additional consent provisions for collection and use of participant data and biological specimens in ancillary studies, if applicable                                                                                                                                               | 19        |
| 5  |                               |     |                                                                                                                                                                                                                                                                                     |           |
| 6  |                               |     |                                                                                                                                                                                                                                                                                     |           |
| 7  | Confidentiality               | 27  | How personal information about potential and enrolled participants will be collected, shared, and maintained in order to protect confidentiality before, during, and after the trial                                                                                                | 18        |
| 8  |                               |     |                                                                                                                                                                                                                                                                                     |           |
| 9  |                               |     |                                                                                                                                                                                                                                                                                     |           |
| 10 | Declaration of interests      | 28  | Financial and other competing interests for principal investigators for the overall trial and each study site                                                                                                                                                                       | N/A       |
| 11 |                               |     |                                                                                                                                                                                                                                                                                     |           |
| 12 |                               |     |                                                                                                                                                                                                                                                                                     |           |
| 13 | Access to data                | 29  | Statement of who will have access to the final trial dataset, and disclosure of contractual agreements that limit such access for investigators                                                                                                                                     | 18        |
| 14 |                               |     |                                                                                                                                                                                                                                                                                     |           |
| 15 |                               |     |                                                                                                                                                                                                                                                                                     |           |
| 16 |                               |     |                                                                                                                                                                                                                                                                                     |           |
| 17 | Ancillary and post-trial care | 30  | Provisions, if any, for ancillary and post-trial care, and for compensation to those who suffer harm from trial participation                                                                                                                                                       | N/A       |
| 18 |                               |     |                                                                                                                                                                                                                                                                                     |           |
| 19 |                               |     |                                                                                                                                                                                                                                                                                     |           |
| 20 | Dissemination policy          | 31a | Plans for investigators and sponsor to communicate trial results to participants, healthcare professionals, the public, and other relevant groups (eg, via publication, reporting in results databases, or other data sharing arrangements), including any publication restrictions | 19        |
| 21 |                               |     |                                                                                                                                                                                                                                                                                     |           |
| 22 |                               |     |                                                                                                                                                                                                                                                                                     |           |
| 23 |                               |     |                                                                                                                                                                                                                                                                                     |           |
| 24 |                               | 31b | Authorship eligibility guidelines and any intended use of professional writers                                                                                                                                                                                                      | Submitted |
| 25 |                               |     |                                                                                                                                                                                                                                                                                     |           |
| 26 |                               | 31c | Plans, if any, for granting public access to the full protocol, participant-level dataset, and statistical code                                                                                                                                                                     | N/A       |
| 27 |                               |     |                                                                                                                                                                                                                                                                                     |           |
| 28 |                               |     |                                                                                                                                                                                                                                                                                     |           |
| 29 | <b>Appendices</b>             |     |                                                                                                                                                                                                                                                                                     |           |
| 30 |                               |     |                                                                                                                                                                                                                                                                                     |           |
| 31 | Informed consent materials    | 32  | Model consent form and other related documentation given to participants and authorised surrogates                                                                                                                                                                                  | N/A       |
| 32 |                               |     |                                                                                                                                                                                                                                                                                     |           |
| 33 |                               |     |                                                                                                                                                                                                                                                                                     |           |
| 34 | Biological specimens          | 33  | Plans for collection, laboratory evaluation, and storage of biological specimens for genetic or molecular analysis in the current trial and for future use in ancillary studies, if applicable                                                                                      | N/A       |
| 35 |                               |     |                                                                                                                                                                                                                                                                                     |           |
| 36 |                               |     |                                                                                                                                                                                                                                                                                     |           |

\*It is strongly recommended that this checklist be read in conjunction with the SPIRIT 2013 Explanation & Elaboration for important clarification on the items. Amendments to the protocol should be tracked and dated. The SPIRIT checklist is copyrighted by the SPIRIT Group under the Creative Commons [“Attribution-NonCommercial-NoDerivs 3.0 Unported”](https://creativecommons.org/licenses/by-nc-nd/3.0/) license.

1  
2  
3  
4  
5  
6  
7  
8  
9  
10  
11  
12  
13  
14  
15  
16  
17  
18  
19  
20  
21  
22  
23  
24  
25  
26  
27  
28  
29  
30  
31  
32  
33  
34  
35  
36  
37  
38  
39  
40  
41  
42  
43  
44  
45  
46  
47  
48  
49  
50  
51  
52  
53  
54  
55  
56  
57  
58  
59  
60

**Medication after a Stroke or TIA**

**Medication after a Stroke or TIA**

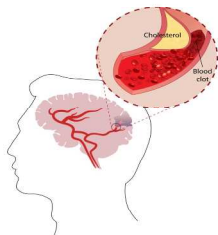

Take your antiplatelet medication called  to lower the risk of blood clots forming in the brain.

Take your cholesterol lowering medication called  to lower the risk of stroke even if your cholesterol is normal.

Take your blood pressure medication called  to lower the risk of stroke.

**Know** about your medications prescribed to reduce the risk of stroke

**Organise** your ongoing supply of your medications

Continue to **take** these medications as agreed with your doctors

**Report** any new symptoms or concerns to your doctor

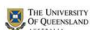

Metro South Health

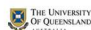

Metro South Health

419x297mm (300 x 300 DPI)

new only

## Participant Information Sheet/Consent Form

|                                                                        |                                                                                                                                      |
|------------------------------------------------------------------------|--------------------------------------------------------------------------------------------------------------------------------------|
| <b>Title</b>                                                           | The use of a patient centred educational exchange model to improve patient's self-management of medicines after a stroke             |
| <b>Short Title</b>                                                     | A conversation with patients about medications after a stroke                                                                        |
| <b>Coordinating Principal Investigator/<br/>Principal Investigator</b> | Mrs Judith Coombes                                                                                                                   |
| <b>Associate Investigators</b>                                         | Associate Professor Neil Cottrell<br>Dr Graham Hall<br>Dr Nabeel Sheikh<br>Dr Leena Aggarwal<br>Ms Marie Williams<br>Ms Debra Rowett |
| <b>Location</b>                                                        | Princess Alexandra Hospital                                                                                                          |

### Part 1 What does my participation involve?

#### Introduction

You are invited to take part in this research project, "A conversation with patients about medications after a stroke." This is because you have been diagnosed with a stroke or Transient Ischemic Attack (TIA). The research project is aiming to test a program designed to educate people about the medications prescribed after they have had a stroke or TIA.

This Participant Information Sheet/Consent Form tells you about the research project. It explains the research involved. Knowing what is involved will help you decide if you want to take part in the research.

Please read this information carefully. Ask questions about anything that you don't understand or want to know more about. Before deciding whether or not to take part, you might want to talk about it with a relative, friend or local doctor.

Participation in any research project is voluntary. If you do not wish to take part, you do not have to. Your decision whether to take part or not to take part, or to take part and then withdraw, will not affect your routine treatment, your relationship with those treating you or your relationship with the Princess Alexandra Hospital.

If you decide you want to take part in the research project, you will be asked to sign the consent section. There are two forms.

By signing the first form, "The study consent form" you are telling us that you:

- Understand what you have read
- Consent to take part in the research project
- Consent to the research that is described



## Princess Alexandra Hospital

- Consent to the use of your personal and health information as described.

You will be given a copy of this Participant Information and Consent Form to keep.

The second form is "The participant consent form for release of Medicare and PBS data. Here you will be asked to fill out a consent form authorising the study access to your complete Medicare and Pharmaceutical Benefits Scheme (PBS) data as outlined below. Medicare collects information on your medical visits and procedures, and the associated costs, while PBS collects information on the prescription medications you have filled at pharmacies. The consent form is sent securely to the Department of Human Services who holds this information confidentially.

### Definitions of Data used in this study:

#### Medicare (MBS)

- Date of service (*Date that the service was rendered by the provider, to the patient*)
- MBS Item number (*Items Numbers as per the Medicare Benefits Schedule*)
- MBS Item description (*describes the service as per the Medicare Benefits Schedule*)
- Item category (*where the service sits in the hierarchical structure according to the Medicare Benefits Schedule*)

#### Pharmaceutical Benefits Scheme (PBS)

- Date of supply (*Date the prescription was supplied by the pharmacy*)
- Date of Prescribing (*Date that the prescription was prescribed by a Medical Practitioner to a patient*)
- PBS Item Number (*Items Numbers reflected in the Pharmaceutical Benefits Scheme*)
- PBS Item Description (*the item description as noted in the Pharmaceutical Benefits Scheme Book*)
- Patient category e.g. general, concession, safety net, doctor's bag (*Patient's eligibility status at the time of supply*)
- Patient contribution (*the contribution paid by the patient*)
- Form category (*Original or repeat prescription*)
- ATC Code (*the code allocated by the World Health Organisation Collaborating Centre for Drug statistics Methodology*)
- ATC Name (*the group the drug falls under in the Anatomical Therapeutic Chemical (ATC) classification system*)

### What is the purpose of this research?

The purpose of this project is to test a program designed to educate people about the medications people are prescribed after they have a stroke or TIA. The program is designed to improve understanding and organisation of ongoing use of the participants' medications. A total of approximately 200 people will participate in this project.

The results of this research will be used by the study pharmacist, Judith Coombes, to obtain a Doctor of Philosophy (PhD) degree.

### What does participation in this research involve?

Participation will only take place after you have given signed consent.

Participation in this project will involve completing a questionnaire on three or four occasions.

The first will be before you are discharged from hospital, the second will take place over the telephone about 3 months after your discharge from hospital and the third over the telephone at

## Princess Alexandra Hospital

12 months after discharge from hospital. The questionnaire will take about ten minutes to complete. You will be asked about your views of your illness (stroke), your view and opinion of your medicines used for stroke about the way you take your stroke medicines and about your quality of life. There are no right or wrong answers to any of the questions in the interview; it is your view and opinion that is important.

About half of the participants in this study will be chosen by chance (random), to have a longer interview with the researcher to have a conversation about their stroke medications prior to their discharge from hospital. This will take about a further ten minutes. These participants will also be contacted by telephone 7-10 days after discharge from hospital. The telephone call will last for about 10 minutes. The telephone call will involve completing the questionnaire and an opportunity to follow-up on any questions they may have about their medicines.

You will also be asked for consent for the release of your Medicare/PBS claims information.

### **What are the possible benefits of taking part?**

No payment will be provided for participation in this study. We cannot guarantee or promise that you will receive any benefits from this research; however possible benefits may include better understanding of the medications you are using to reduce the risk of a further stroke. It may also help you to organise ongoing use of your medications.

### **What are the possible risks and disadvantages of taking part?**

This study involves completing a questionnaire and for about half the participants discussing your stroke medications through one face to face interview and one telephone call. There is no foreseeable added risk to you above the risks of everyday living.

### **What if I wish to withdraw from this research project?**

If you decide to take part and later change your mind, you are free to withdraw from this research project at any stage. You can ask to withdraw during the interview or you can inform Mrs Judith Coombes your desire to withdraw by telephone on 3346 1944 or 0428814397, email [Judith@pharmacy.uq.edu.au](mailto:Judith@pharmacy.uq.edu.au) or by mail addressed to Judith Coombes, Pharmacy Department, Princess Alexandra Hospital, Ipswich Rd, Woolloongabba QLD 4102.

If you do withdraw your consent during the research project, the investigator will not collect additional information from you or about you, although information already collected will be retained to ensure that the results of the research project can be measured properly. You should be aware that data collected up to the time you withdraw will form part of the research project results. If you do not want the researcher to do this, you must tell the researcher.

### **What happens when the research project ends?**

You may request the study results when it is completed by providing an address that the report can be sent to or at a later date by contacting Judith Coombes (contact details above).

## **Part 2 How is the research project being conducted?**

### **What will happen to information about me?**

By signing the consent form you consent to the study pharmacist collecting and using personal information about you for the research project. Information about you may be obtained from your health records held at this hospital for the purpose of this research. By signing the consent

## Princess Alexandra Hospital

form you agree to the research team accessing health records if they are relevant to your participation in this research project.

Any information obtained in connection with this research project that can identify you will remain confidential. In all reports from this research, information will be provided in such a way that you cannot be identified.

The information collected on paper will be stored in a locked filing cabinet in a locked office, with access only to the principal investigator stated above. Both written and electronic information containing confidential data will be stored for a period of seven years after publication of the final report or for 10 years, whichever is earlier, and then destroyed.

### Who is organising and funding the research?

This research project is being conducted by *Mrs Judith Coombes, Associate Professor Neil Cottrell and Dr Graham Hall, Dr Nabeel Sheikh, Dr Leena Aggarwal, Ms Marie Williams, Ms Debra Rowett and Associate Professor Jenny Whitty*

Mrs Coombes, Associate Professor Cottrell, Ms Rowett and Associate Professor Whitty are affiliated with the School of Pharmacy at The University of Queensland and Dr Hall, Dr Sheikh, Dr Aggarwal, Ms Williams and Mrs Coombes are affiliated with the Princess Alexandra Hospital.

### Who has reviewed the research project?

All research in Australia involving humans is reviewed by an independent group of people called a Human Research Ethics Committee (HREC). The ethical aspects of this research project have been approved by the HREC of *The Princess Alexandra Hospital*. This study adheres to the Guidelines of the ethical review process of the University of Queensland. This project will be carried out according to the *National Statement on Ethical Conduct in Human Research (2007)*. This statement has been developed to protect the interests of people who agree to participate in human research studies.

## 11 Who to contact

If you have any queries or any problems concerning this research project, please contact

|           |                                                                                    |
|-----------|------------------------------------------------------------------------------------|
| Name      | Judith Coombes                                                                     |
| Position  | <i>Advanced Pharmacist Education</i>                                               |
| Telephone | <i>0428814397, 33461944 or contact the switchboard 3176 2111 pager number 8009</i> |
| Email     | <i>Judith@pharmacy.uq.edu.au</i>                                                   |

If you would like to speak to an officer not involved in the study or if you have any complaints about any aspect of the project, the way it is being conducted or any questions about being a research participant in general, then you may contact:

## Princess Alexandra Hospital

---

|           |                                                                                                      |
|-----------|------------------------------------------------------------------------------------------------------|
| Position  | Coordinator, Metro South Hospital and Health Service Human Research Ethics Committee                 |
| Telephone | 3343 8049                                                                                            |
| Email     | <a href="mailto:ethicsresearch.pah@health.qld.gov.au">ethicsresearch.pah@health.qld.gov.au</a><br>or |
| Position  | Human Ethics Unit Coordinator, University of Queensland                                              |
| Telephone | 3365 3924                                                                                            |

For peer review only

1  
2  
3  
4  
5  
6  
7  
8  
9  
10  
11  
12  
13  
14  
15  
16  
17  
18  
19  
20  
21  
22  
23  
24  
25  
26  
27  
28  
29  
30  
31  
32  
33  
34  
35  
36  
37  
38  
39  
40  
41  
42  
43  
44  
45  
46  
47  
48  
49  
50  
51  
52  
53  
54  
55  
56  
57  
58  
59  
60

Princess Alexandra Hospital

---

For peer review only

# Study Consent Form

**Title** The use of a patient centred educational exchange model to improve patient's self-management of medicines after a stroke

**Short Title** A conversation with patients about medications after a stroke

**Coordinating Principal Investigator/  
Principal Investigator** Mrs Judith Coombes

**Associate Investigators** Associate Professor Neil Cottrell  
Dr Graham Hall  
Dr Nabeel Sheikh  
Dr Leena Aggarwal  
Ms Marie Williams  
Ms Debra Rowett

**Location** Princess Alexandra Hospital

## Declaration by Participant

I have read the Participant Information Sheet or someone has read it to me in a language that I understand.

I understand the purposes, procedures and risks of the research described in the project.

I have had an opportunity to ask questions and I am satisfied with the answers I have received.

I freely agree to participate in this research project as described and understand that I am free to withdraw at any time during the project without affecting my future health care.

I understand that I will be given a signed copy of this document to keep.

|                                                                        |
|------------------------------------------------------------------------|
| Name of Participant (please print) _____<br>Signature _____ Date _____ |
|------------------------------------------------------------------------|

|                                                                                                   |
|---------------------------------------------------------------------------------------------------|
| Name of Witness* to<br>Participant's Signature (please print) _____<br>Signature _____ Date _____ |
|---------------------------------------------------------------------------------------------------|

\* Witness is not to be the investigator, a member of the study team or their delegate. In the event that an interpreter is used, the interpreter may not act as a witness to the consent process. Witness must be 18 years or older.

## Declaration by Senior Researcher

I have given a verbal explanation of the research project, its procedures and risks and I believe that the participant has understood that explanation.

|                                                                                 |
|---------------------------------------------------------------------------------|
| Name of Senior Researcher<br>(please print) _____<br>Signature _____ Date _____ |
|---------------------------------------------------------------------------------|

Note: All parties signing the consent section must date their own signature.

## Form for Withdrawal of Participation -

1  
2  
3  
4  
5 Title The use of a patient centred educational  
6 exchange model to improve patient's self-  
7 management of medicines after a stroke  
8  
9 Short Title A conversation with patients about medications  
10 after a stroke  
11  
12 Coordinating Principal Investigator/ Principal  
13 Investigator Mrs Judith Coombes  
14  
15 Associate Investigators Associate Professor Neil Cottrell  
16 Dr Graham Hall  
17 Dr Nabeel Sheikh  
18 Dr Leena Aggarwal  
19 Ms Marie Williams  
20 Ms Debra Rowett  
21 Associate Professor Jenny Whitty  
22 Location Princess Alexandra Hospital  
23

### **Declaration by Participant**

24  
25  
26 I wish to withdraw from participation in the above research project and understand that such  
27 withdrawal will not affect my routine treatment, my relationship with those treating me or my  
28 relationship with Princess Alexandra Hospital  
29

30  
31 Name of Participant (please print) \_\_\_\_\_  
32  
33 Signature \_\_\_\_\_ Date \_\_\_\_\_  
34  
35  
36  
37  
38  
39  
40  
41  
42  
43  
44  
45  
46  
47  
48  
49  
50  
51  
52  
53  
54  
55  
56  
57  
58  
59  
60

**Participant ID:**

**PARTICIPANT CONSENT FORM FOR RELEASE OF MBS/PBS DATA**

Consent to release of Medicare and/or Pharmaceutical Benefits Scheme (PBS) claims information for the purposes of “The use of a patient centred educational exchange model to improve patient’s self-management of medicines after a stroke” Study

**Important Information**

Complete this form to request the release of personal Medicare claims information and/or PBS claims information to “The use of a patient centred educational exchange model to improve patient’s self-management of medicines after a stroke” study.

Any changes to this form must be initialled by the signatory. Incomplete forms may result in the study not being provided with your information.

By signing this form, I acknowledge that I have been fully informed and have been provided with information about this study. I have been given an opportunity to ask questions and understand the possibilities of disclosures of my personal information.

**PARTICIPANT DETAILS**

1. Mr  Mrs  Miss  Ms  Other

Family name: \_\_\_\_\_ First given name: \_\_\_\_\_

Other given name (s): \_\_\_\_\_

Date of birth: DD/MM/YYYY

2. Medicare card number: \_\_\_\_\_

3. Permanent address: \_\_\_\_\_

Postal address (if different to above): \_\_\_\_\_

**AUTHORISATION**

4. I authorise the Department of Human Services to provide my:

Medicare claims history OR

PBS claims history OR

Medicare & PBS claims history

for the period 01/07/2014 to: 31/10/2018 to “The use of a patient centred educational program to improve patient’s self-management of medicines after a stroke” Study.

\*Note: The Department of Human Services can only extract 4.5 years of data (prior to the date of extraction), The consent period above may result in multiple extractions.

**DECLARATION**

I declare that the information on this form is true and correct.

5. Signed: \_\_\_\_\_ (participant’s signature) Dated: DD/MM/YYYY OR

6. Signed by \_\_\_\_\_ (full name) \_\_\_\_\_ (signature) on behalf of participant

Dated: DD/MM/YYYY

Power of attorney\*\*

Guardianship order\*\*

\*\* Please attach supporting evidence

**APP 5 – PRIVACY NOTICE**



Your personal information is protected by law, including the Privacy Act 1988, and is collected by the Australian Government Department of Human Services. The collection of your personal information by the department is necessary for administering requests for statistical and other data.

Your information may be used by the department or given to other parties for the purposes of research, investigation or where you have agreed or it is required or authorised by law.

You can get more information about the way in which the Department of Human Services will manage your personal information, including our privacy policy at [humanservices.gov.au/privacy](http://humanservices.gov.au/privacy) or by requesting a copy from the department.

**Power of attorney** – A power of attorney is a document that appoints a person to act on behalf of another person who grants that power. In particular, an enduring power of attorney allows the appointed person to act on behalf of another person even when that person has become mentally incapacitated. The powers under a power of attorney may be unlimited or limited to specific acts.

**Guardianship order** – A Guardianship order is an order made by a Guardianship Board/Tribunal that appoints a guardian to make decisions for another person. A Guardianship order may be expressed broadly or limited to particular aspects of the care of another person.

### A sample of the information that may be included in your Medicare claims history:

| Date of service | Item number | Item description     | Provider charge | Schedule Fee | Benefit paid | Patient out of pocket | Bill type |
|-----------------|-------------|----------------------|-----------------|--------------|--------------|-----------------------|-----------|
| 20/04/09        | 00023       | Level B consultation | \$38.30         | \$34.30      | \$34.30      | \$4.00                | Cash      |
| 22/06/09        | 11700       | ECG                  | \$29.50         | \$29.50      | \$29.50      |                       | Bulk Bill |

| Scrambled ordering Provider number* | Scrambled rendering Provider number* | Date of referral | Rendering Provider postcode | Ordering Provider postcode | Hospital indicator | Item category |
|-------------------------------------|--------------------------------------|------------------|-----------------------------|----------------------------|--------------------|---------------|
|                                     | 999999A                              |                  | 2300                        |                            | N                  | 1             |
| 999999A                             | 999999A                              | 20/04/09         | 2300                        | 2302                       | N                  | 2             |

\* Scrambled Provider number refers to a unique scrambled provider number identifying the doctor who provided/referred the service. Generally, each individual provider number will be scrambled and the identity of that provider will not be disclosed.

### A sample of the information that may be included in your PBS claims history:

| Date of supply | Date of prescribing | PBS item code | Item description      | Patient category      | Patient contribution (this includes under copayment amounts**) | Net Benefit (this includes under copayment amounts**) | Scrambled Prescriber number* | Pharmacy postcode |
|----------------|---------------------|---------------|-----------------------|-----------------------|----------------------------------------------------------------|-------------------------------------------------------|------------------------------|-------------------|
| 06/03/09       | 01/03/09            | 03133X        | Oxazepam Tablet 30 mg | Concessional Ordinary | \$5.30                                                         | \$25.55                                               | 9999999                      | 2560              |
| 04/07/09       | 28/05/09            | 03161J        | Diazepam Tablet 2 mg  | General Ordinary      | \$30.85                                                        |                                                       | 9999999                      | 2530              |

| Form Category | ATC Code   | ATC Name |
|---------------|------------|----------|
| Original      | N05 B A 04 | Oxazepam |
| Repeat        | N05 B A 01 | Diazepam |

\* Scrambled Prescriber number refers to a unique scrambled prescriber number identifying the doctor who prescribed the prescription. Generally, each individual prescriber number will be scrambled and the identity of that prescriber will not be disclosed.

\*\* Under co-payments can now be provided for data after 1 June 2012
